# Supplementary material for: Visible-light-enabled aerobic oxidative Csp3–H functionalization of glycine derivatives using an organic photocatalyst: access to substituted quinoline-2-carboxylates
Source: Royal Society of Chemistry journal article supplement (doi:10.1039/d0ob01837f), 2020-01-01

## Electronic Supplementary Information

### **Visible light-enabled aerobic oxidative C<sub>sp3</sub>-H functionalization of glycine derivatives using an organic photocatalyst: access to substituted quinoline-2-carboxylates**

Jingxin Wang, Liqi Li, Ying Guo, Shengyu Li, Shutao Wang, Ying Li, Yuan Zhang\*

State Key Laboratory of Applied Organic Chemistry, College of Chemistry and Chemical Engineering, Lanzhou University, 222 Tianshui South Road, Lanzhou 730000, P. R. China.

\*E-mail: zhangyuan@lzu.edu.cn.

#### **Table of Contents**

|                                                             |    |
|-------------------------------------------------------------|----|
| 1. Optimization of Reaction Conditions                      | S2 |
| 2. Experiment Information                                   | S6 |
| 3. Luminescence Quenching Experiments                       | S7 |
| 4. EPR Spectra                                              | S8 |
| 5. References                                               | S8 |
| 6. Copies of <sup>1</sup> H and <sup>13</sup> C NMR Spectra | S9 |

## 1. Optimization of Reaction Conditions

**Description of the blue LEDs used in this reaction:** The blue LED strip was purchased from supplier (BeiLiang, Type and Specification: QDD5050K60C, 11.5 W/m, wavelengths: 450-470nm). The blue LED strip (2 m) was coiled around a transparent glass culture vessel (diameter: 14 cm), and the reaction flask was placed into the center of the culture vessel. The blue LED bulb was purchased from supplier (QianFang, 3 W, wavelengths: 450-470nm).

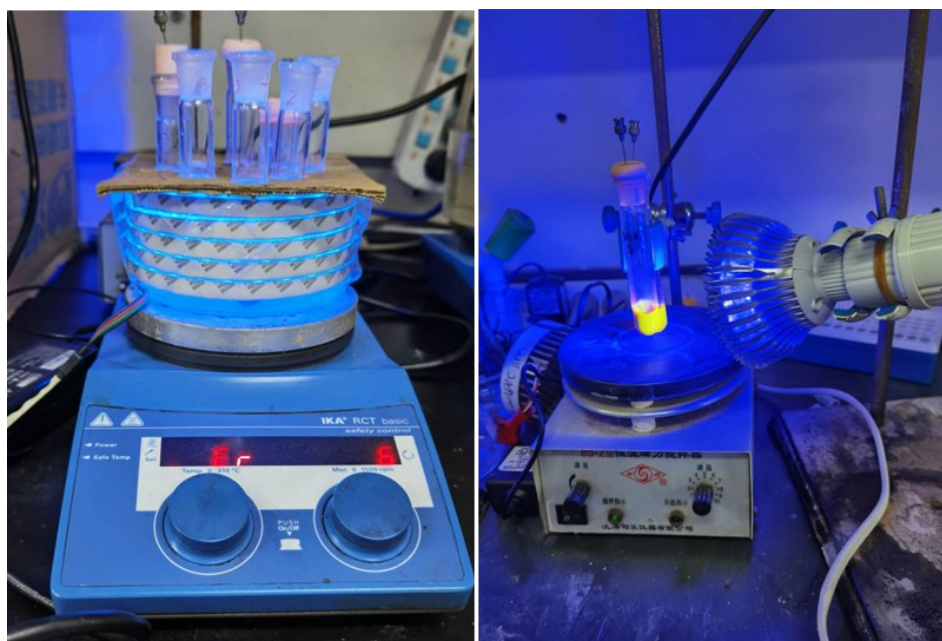

**Figure S1.** The reaction set-up of the visible light-induced reaction.

**Table S1.** Screening of Photocatalysts<sup>a</sup>

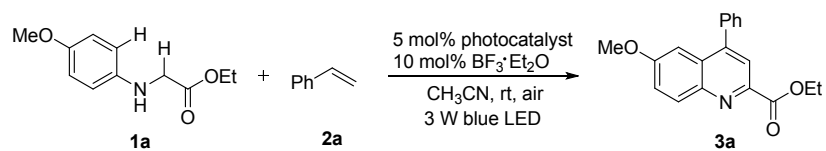

| entry | photocatalyst                   | yield (%) <sup>b</sup> |
|-------|---------------------------------|------------------------|
| 1     | Rhodamine 6G                    | 11                     |
| 2     | Rose Bengal                     | 10                     |
| 3     | $\text{Acr}^+\text{MesClO}_4^-$ | -                      |
| 4     | Methylene blue                  | -                      |

<sup>a</sup>Reaction conditions: **1a** (0.1 mmol), **2a** (0.5 mmol), photocatalyst (5 mol%),  $\text{BF}_3 \cdot \text{Et}_2\text{O}$  (10 mol%),  $\text{CH}_3\text{CN}$  (1.0 mL), 3 W blue LED light irradiation under air for 30 h. <sup>b</sup>Isolated yields.

**Table S2.** Screening of Acids<sup>a</sup>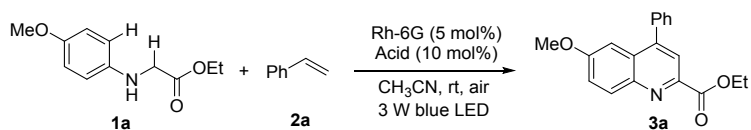

| entry              | acid                               | yield (%) <sup>b</sup> |
|--------------------|------------------------------------|------------------------|
| 1                  | BF <sub>3</sub> ·Et <sub>2</sub> O | 11                     |
| 2                  | TFA                                | 20                     |
| 3                  | Citric acid                        | 21                     |
| 4                  | TsOH                               | 33                     |
| 5                  | H <sub>2</sub> SO <sub>4</sub>     | 58                     |
| 6 <sup>c</sup>     | TfOH                               | 53                     |
| 7                  | -                                  | ND                     |
| 8 <sup>c</sup>     | HClO <sub>4</sub>                  | 60                     |
| 9 <sup>c, d</sup>  | HClO <sub>4</sub>                  | 68                     |
| 10 <sup>d</sup>    | HClO <sub>4</sub>                  | 55                     |
| 11 <sup>d, e</sup> | HClO <sub>4</sub>                  | 64                     |
| 12 <sup>d, f</sup> | HClO <sub>4</sub>                  | 62                     |

<sup>a</sup>Reaction conditions: **1a** (0.1 mmol), **2a** (0.5 mmol), Rhodamine 6G (5 mol%), additive (10 mol%), CH<sub>3</sub>CN (1.0 mL), 3 W blue LED light irradiation under air for 24 h. <sup>b</sup>Isolated yields. <sup>c</sup>15 mol% of additive was used. <sup>d</sup>Under the irradiation of 23 W blue LED strip. <sup>e</sup>20 mol% HClO<sub>4</sub> was used. <sup>f</sup>30 mol% HClO<sub>4</sub> was used.

**Table S3.** Screening of Solvents<sup>a</sup>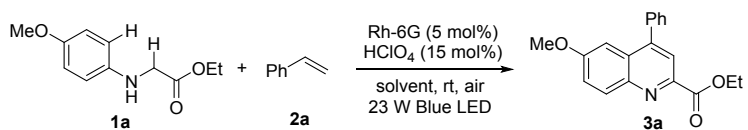

| entry                | solvent                 | yield (%) <sup>b</sup> |
|----------------------|-------------------------|------------------------|
| 1                    | CH <sub>3</sub> CN      | 68                     |
| 2                    | DCE                     | 54                     |
| 3                    | DCM                     | 40                     |
| <b>4<sup>c</sup></b> | <b>CH<sub>3</sub>CN</b> | <b>75</b>              |
| 5 <sup>d</sup>       | CH <sub>3</sub> CN      | 71                     |
| 6 <sup>c,e</sup>     | CH <sub>3</sub> CN      | 51                     |

<sup>a</sup>Reaction conditions: **1a** (0.1 mmol), **2a** (0.5 mmol), Rhodamine 6G (5 mol %), HClO<sub>4</sub> (15 mol%), solvent (1.0 mL), 23 W blue LED light irradiation under air for 24 h. <sup>b</sup>Isolated yields. <sup>c</sup>2.0 mL CH<sub>3</sub>CN was used. <sup>d</sup>3.0 mL CH<sub>3</sub>CN was used. <sup>e</sup>A 5 W green LED bulb was used as the light source.

## 2. Experiment Information

### 2.1 General Information.

Unless otherwise noted, all reagents were purchased from commercial sources and used as received without further purification. *N*-arylglycine derivatives<sup>1,2</sup> were prepared according to literature procedures. Unless otherwise indicated, all experiments were carried out under air atmosphere. Irradiation of photochemical reactions was carried out using a 3 W blue LED bulb or a 23 W blue LED strip. The silica gel (200–300 meshes) was used for column chromatography and TLC inspections were taken on silica gel GF254 plates. Liquid <sup>1</sup>H and <sup>13</sup>C NMR spectra were recorded on a Bruker Avance III 400 MHz spectrometer. High resolution mass spectra (HRMS) were obtained on a mass spectrometer by using electrospray ionization (ESI) analyzed by quadrupole time-of-flight (QToF). Luminescence spectra were surveyed on a PerkinElmer LS 55 spectrophotometer. EPR spectra were recorded at room temperature using an EPR spectrometer at 9.448 GHz.

### 2.2 General Procedure for the Metal-Free Visible Light-Induced Oxidative Dehydrogenative Coupling/Aromatization Tandem Reaction of Glycine Esters and Alkenes.

To a solution of *N*-arylglycine ester **1a** (20.9 mg, 0.1 mmol, 1 eq) and Rhodamine 6G (2.4 mg, 0.005 mmol, 5 mol%) in dry CH<sub>3</sub>CN (2.0 mL, 0.05 M) were added HClO<sub>4</sub> (the HClO<sub>4</sub> used in this study was purchased as neat; 1.5 mg, 0.015 mmol, 15 mol%) and styrene **2a** (52.1 mg, 57.3 μL, 0.5 mmol, 5 eq). The mixed solution was irradiated with blue LED ((3 W in optimization, 23 W in scope) under air atmosphere at room temperature. After completion of the reaction as monitored by TLC, the solvent was removed under vacuo, and the residue was separated by silica gel column chromatography (with petroleum ether/EtOAc = 8/1 as eluent) to afford the product **3a**.

### 3. Luminescence Quenching Experiments

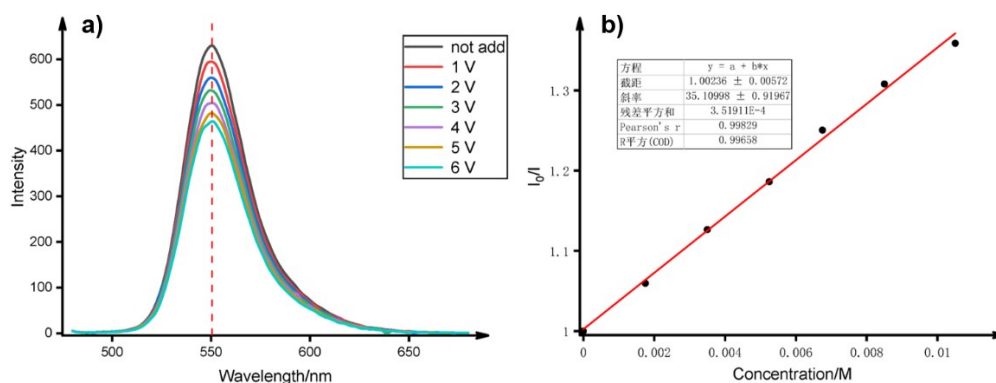

**Figure S2.** a) Changes in the fluorescence spectra of Rh-6G ( $1.0 \times 10^{-6}$  M) upon the progressive addition of **1a** ( $1.5 \times 10^{-3}$  M) in  $\text{CH}_3\text{CN}$ ; b) Stern–Volmer quenching plot of Rh-6G in the presence of **1a**.

## 4. EPR Spectra

### General Information.

EPR spectra were recorded at room temperature using an EPR spectrometer at 9.445 GHz. Typical spectrometer parameters are shown as follows, sweep width: 100.0 G; center field set: 3362.0 G; time constant: 81.920 ms; sweep time: 75.0 s; modulation amplitude: 0.8 G; modulation frequency: 100.0 kHz; receiver gain:  $1.00 \times 10^3$ ; microwave power: 24.640 mW.

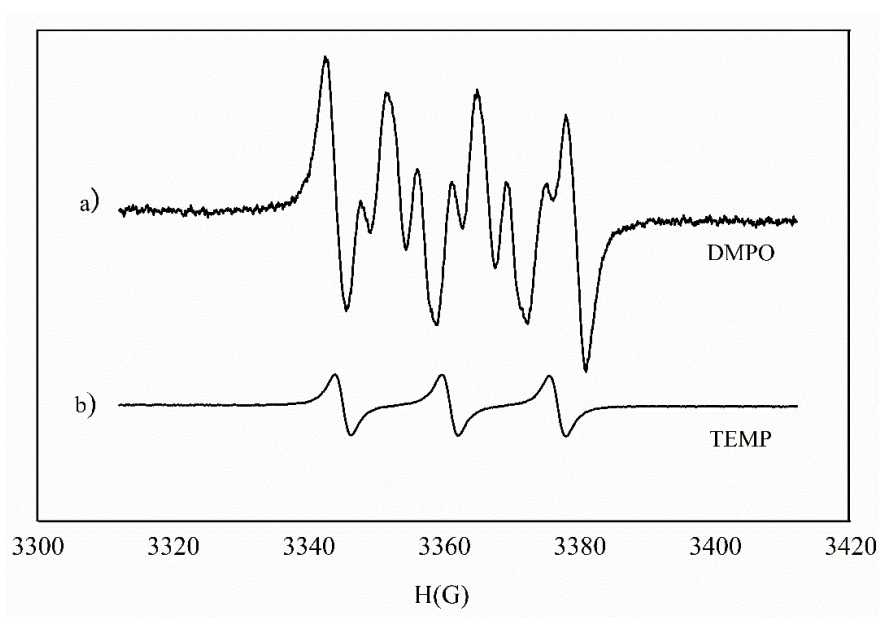

**Figure S3.** EPR spectra of a solution of a) **1a** ( $0.01 \text{ molL}^{-1}$ ), Rhodamine 6G ( $5 \times 10^{-4} \text{ molL}^{-1}$ ), and DMPO ( $0.1 \text{ molL}^{-1}$ ) in air-saturated  $\text{CH}_3\text{CN}$  upon irradiation with blue LED for 100 s; b) **1a** ( $0.01 \text{ molL}^{-1}$ ), Rhodamine 6G ( $5 \times 10^{-4} \text{ molL}^{-1}$ ), and TEMP ( $0.12 \text{ molL}^{-1}$ ) in air-saturated  $\text{CH}_3\text{CN}$  upon irradiation with blue LED for 100 s.

## 5. References

- [1] Xie, J.; Huang, Z.-Z. *Angew. Chem., Int. Ed.* **2010**, *49*, 10181.
- [2] Zhao, L.; Basle, O.; Li, C.-J. *Proc. Natl. Acad. Sci. U. S. A.* **2009**, *106*, 4106.



## 6. Copies of $^1\text{H}$ and $^{13}\text{C}$ NMR Spectra

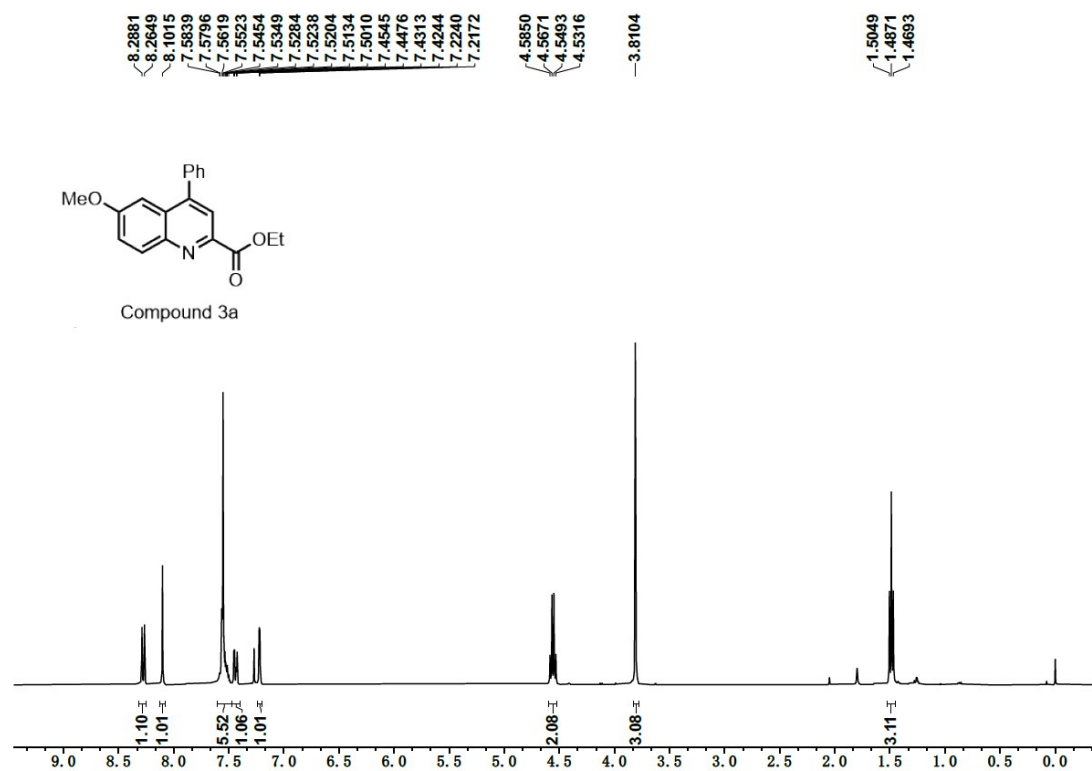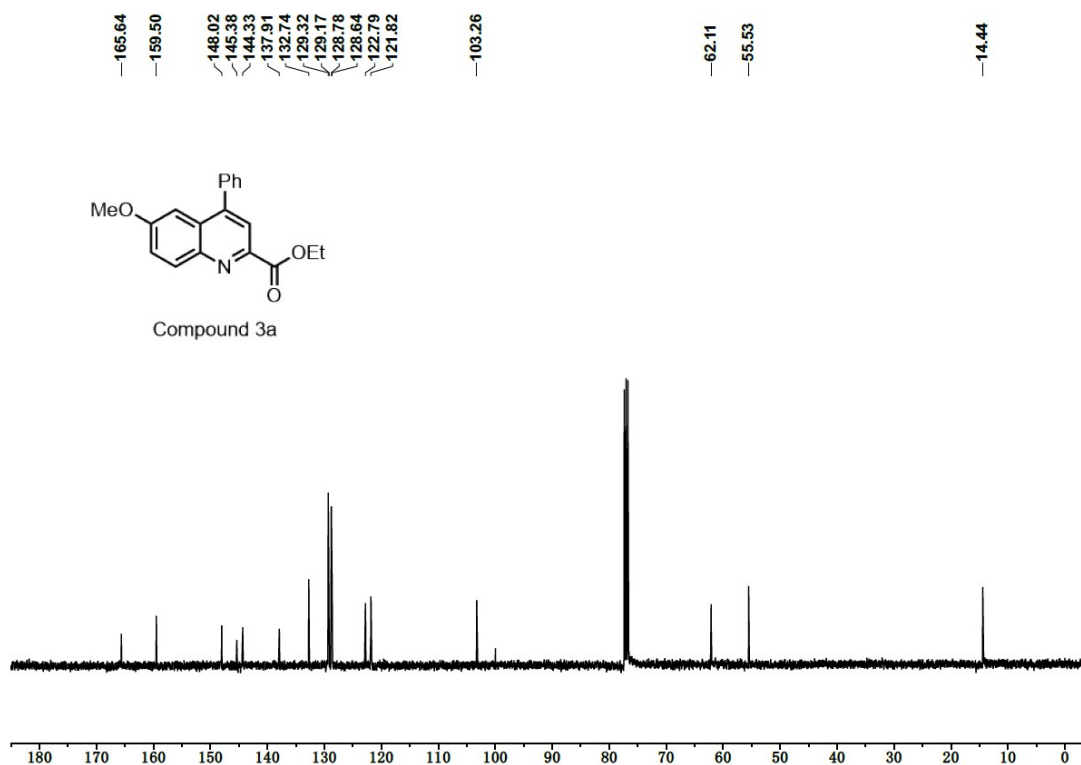

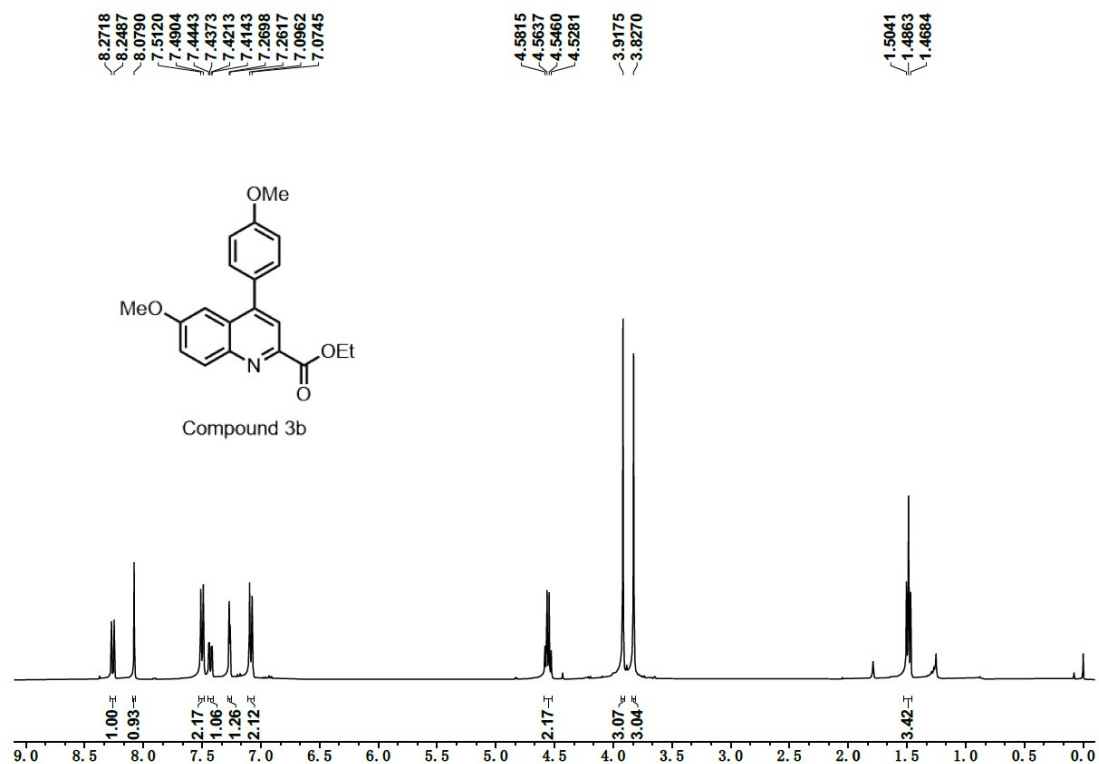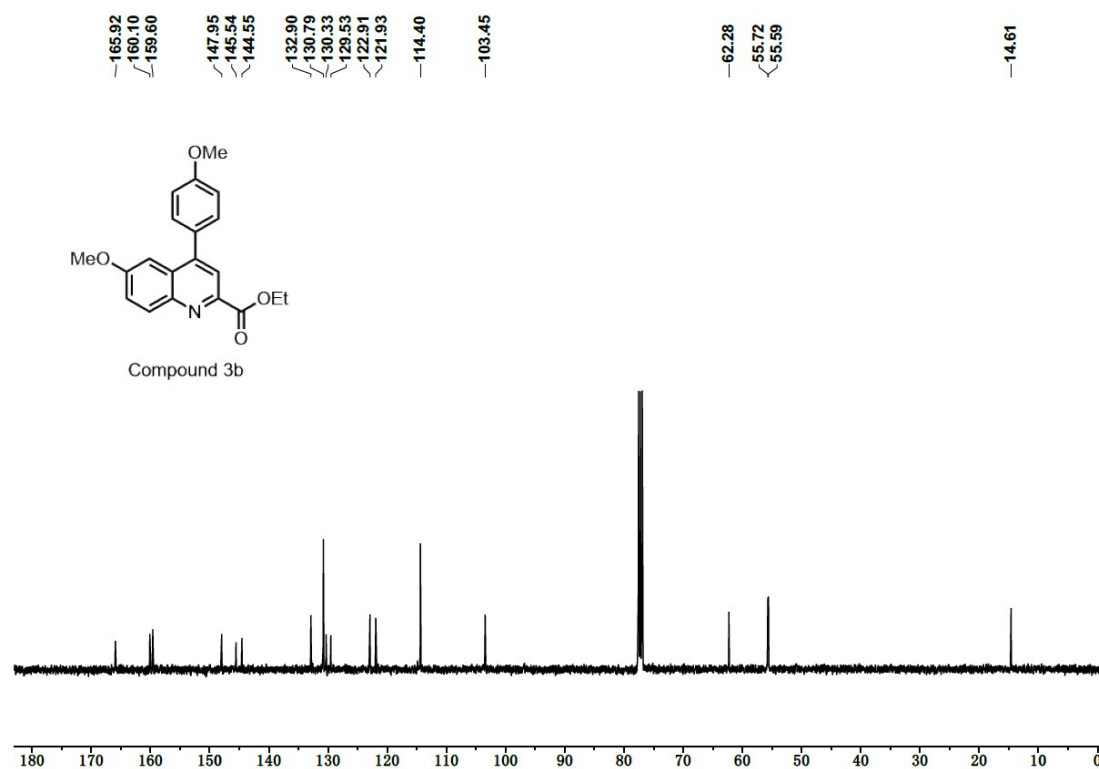

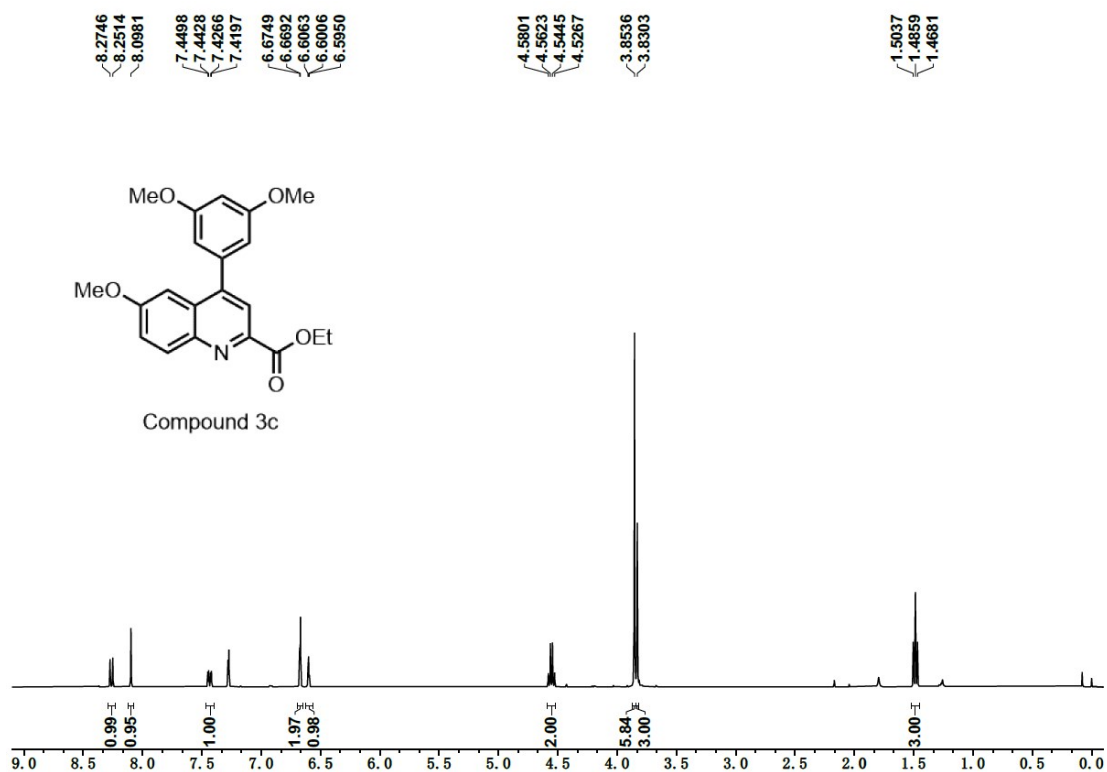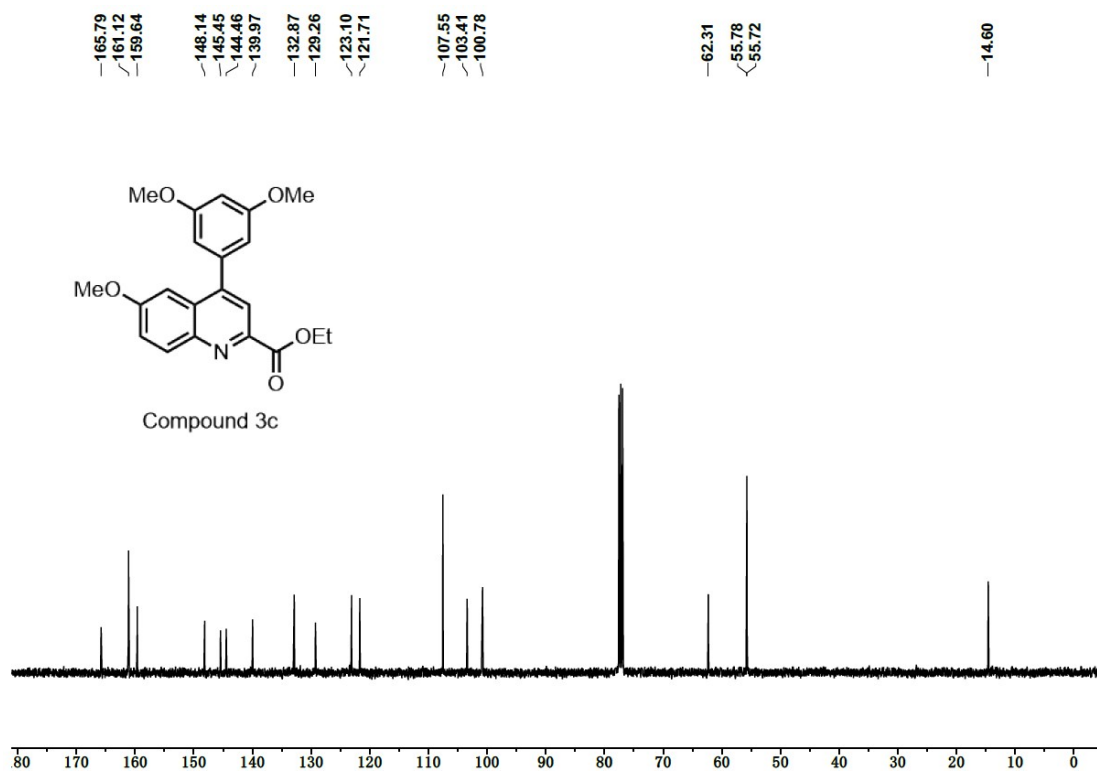

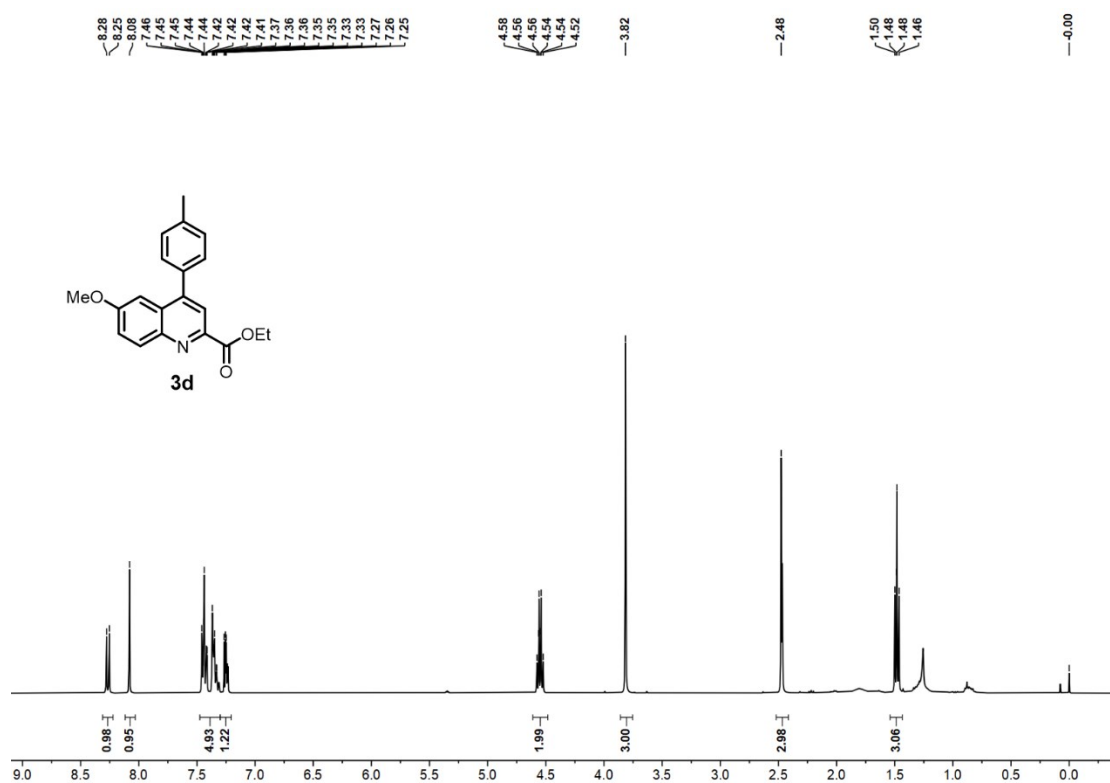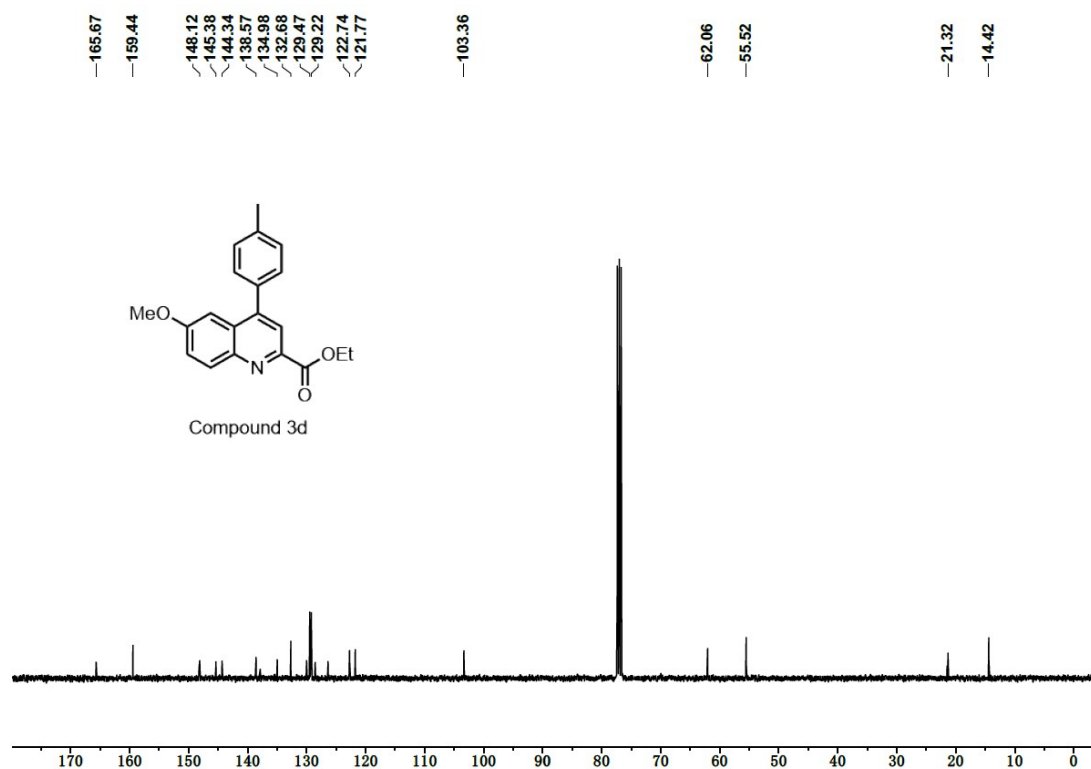

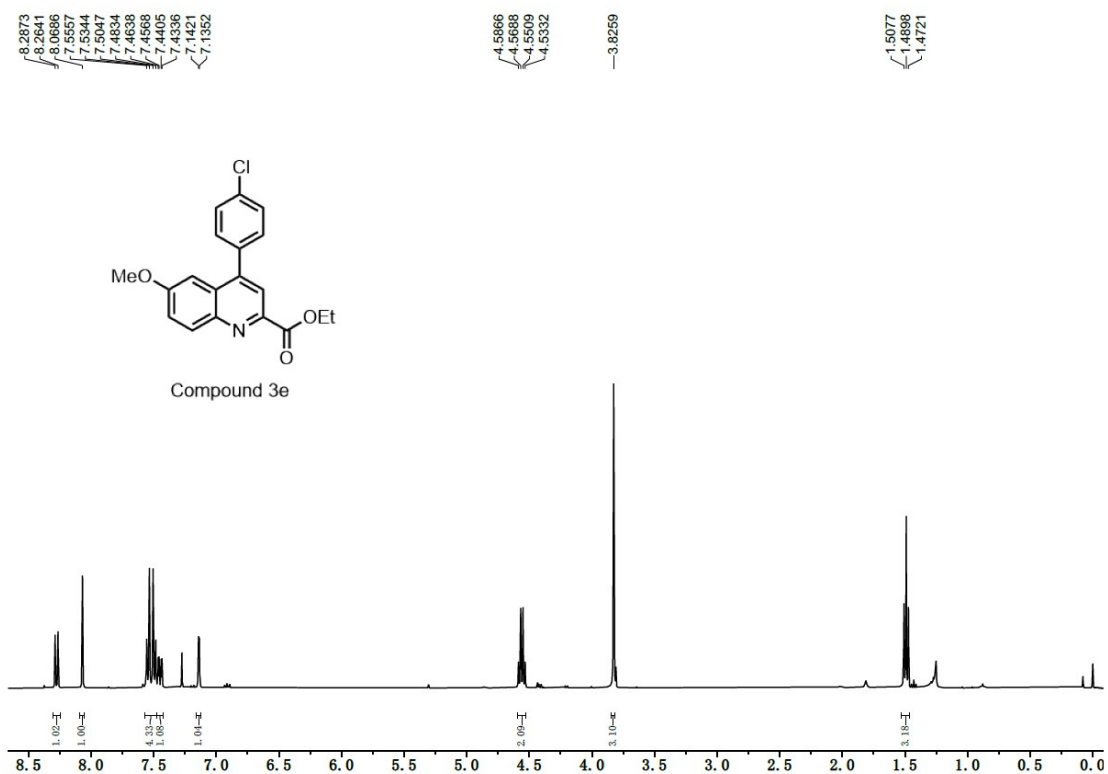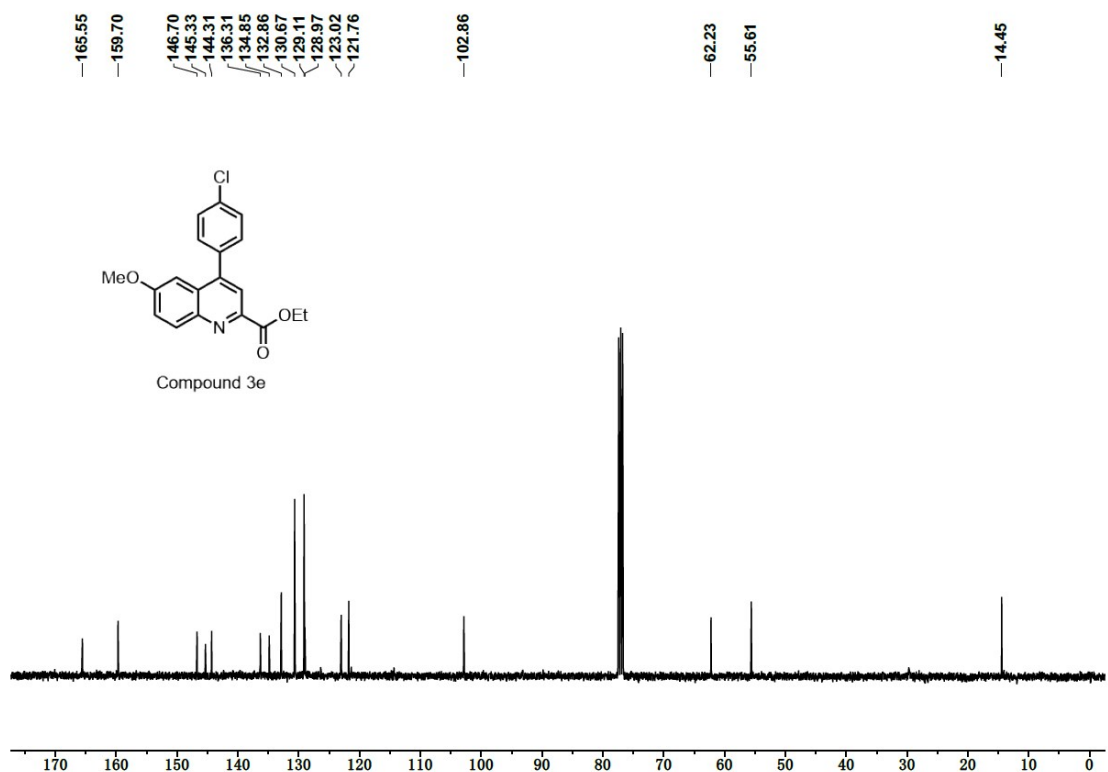

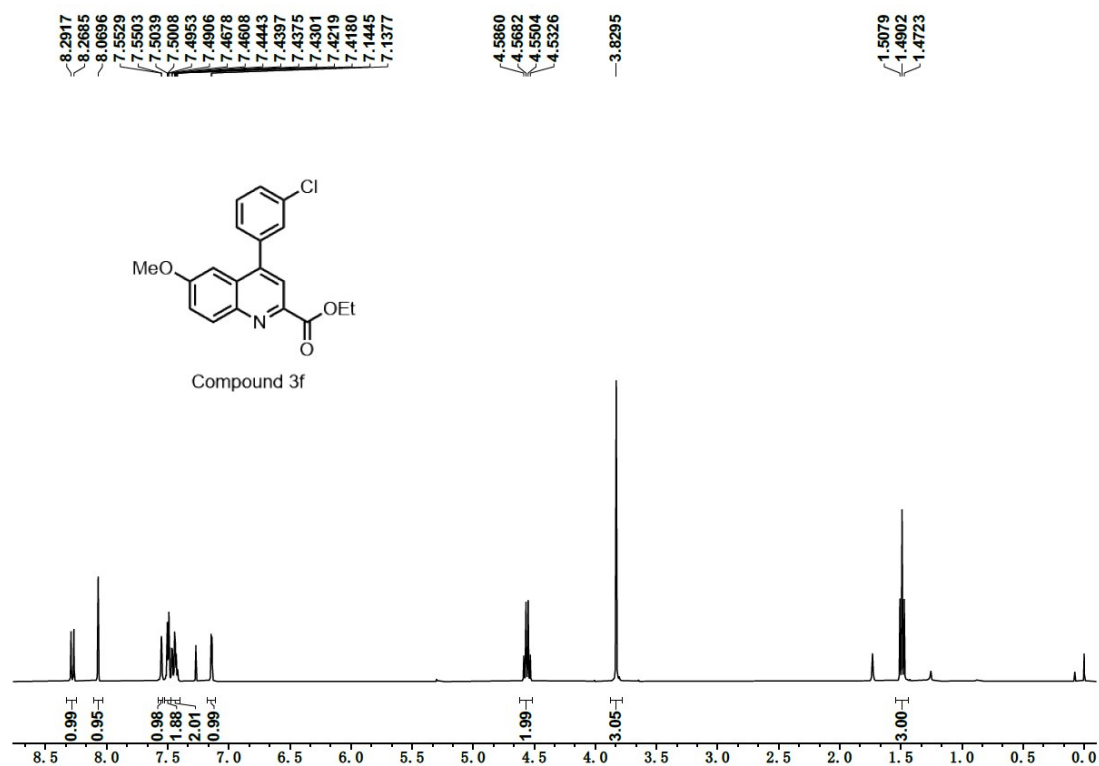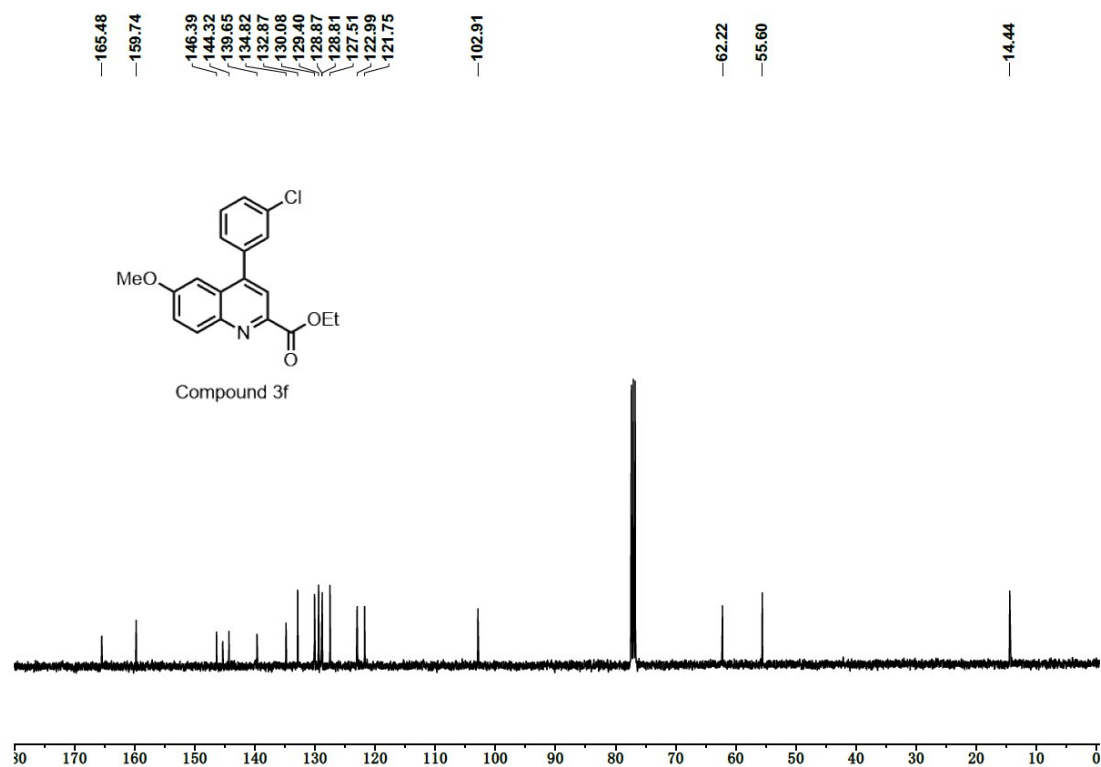

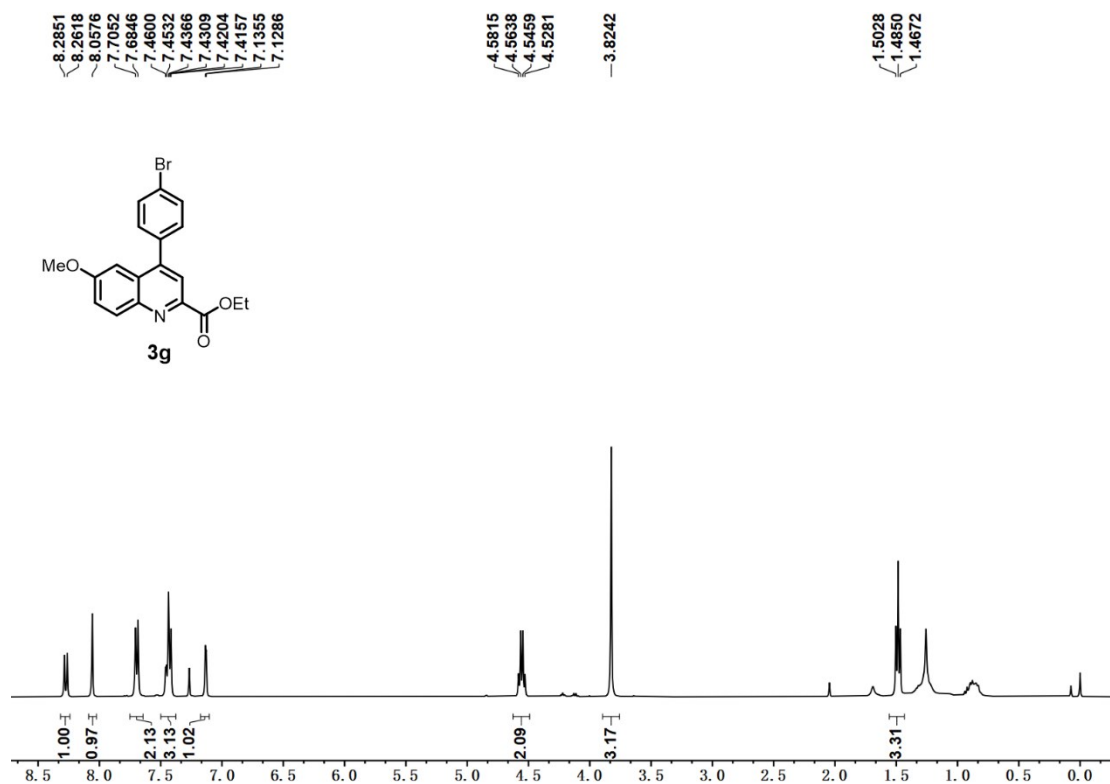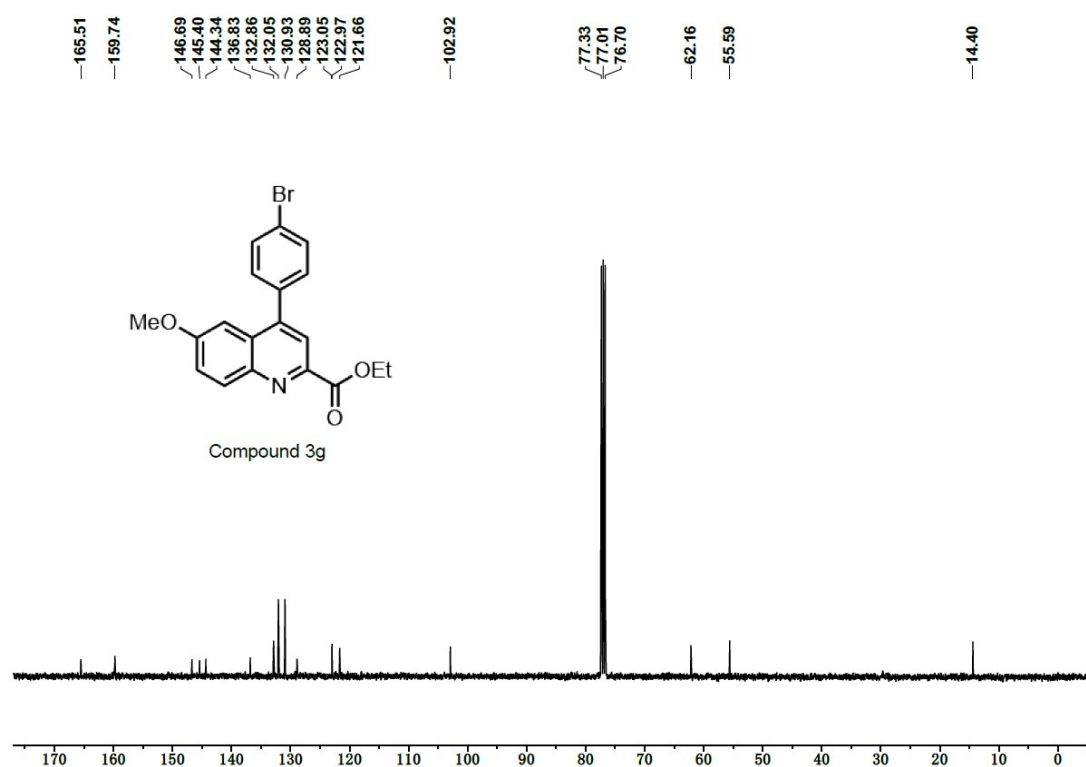

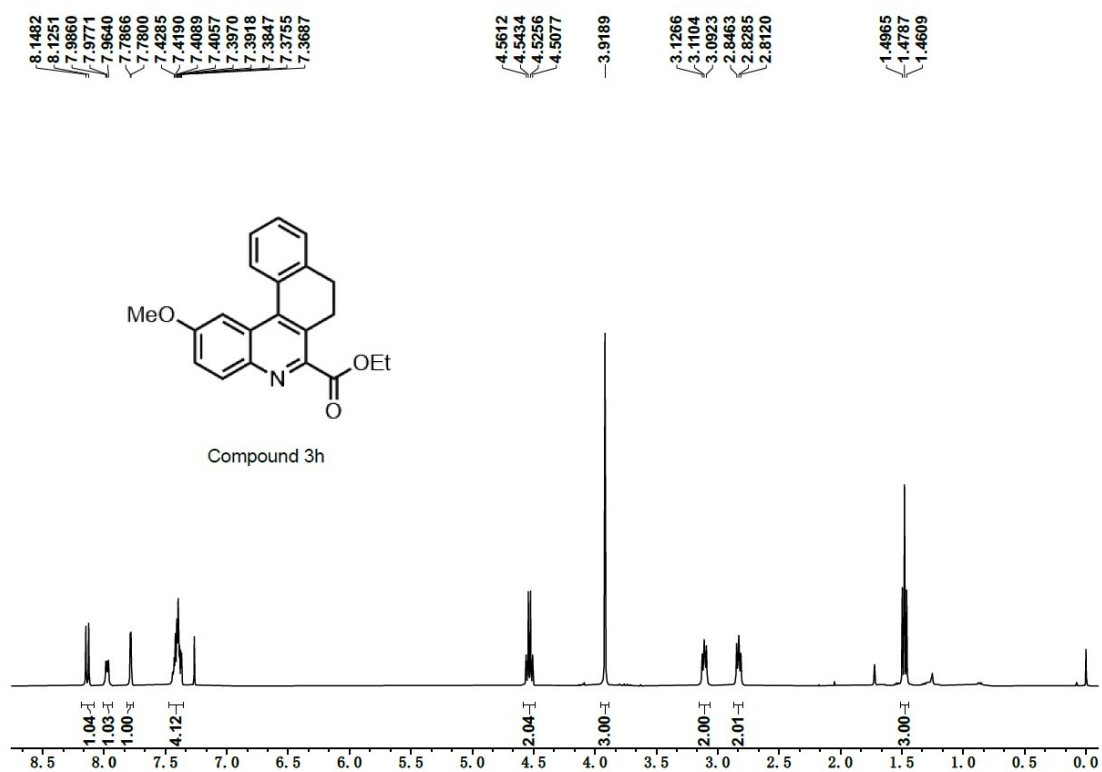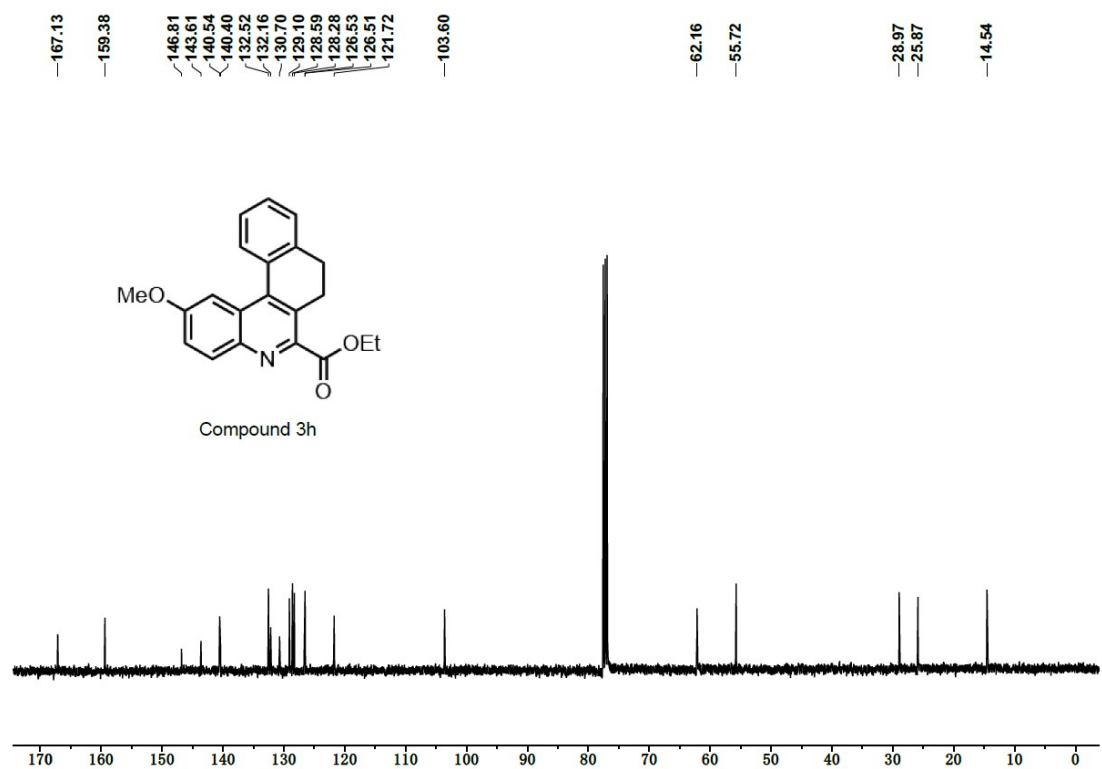



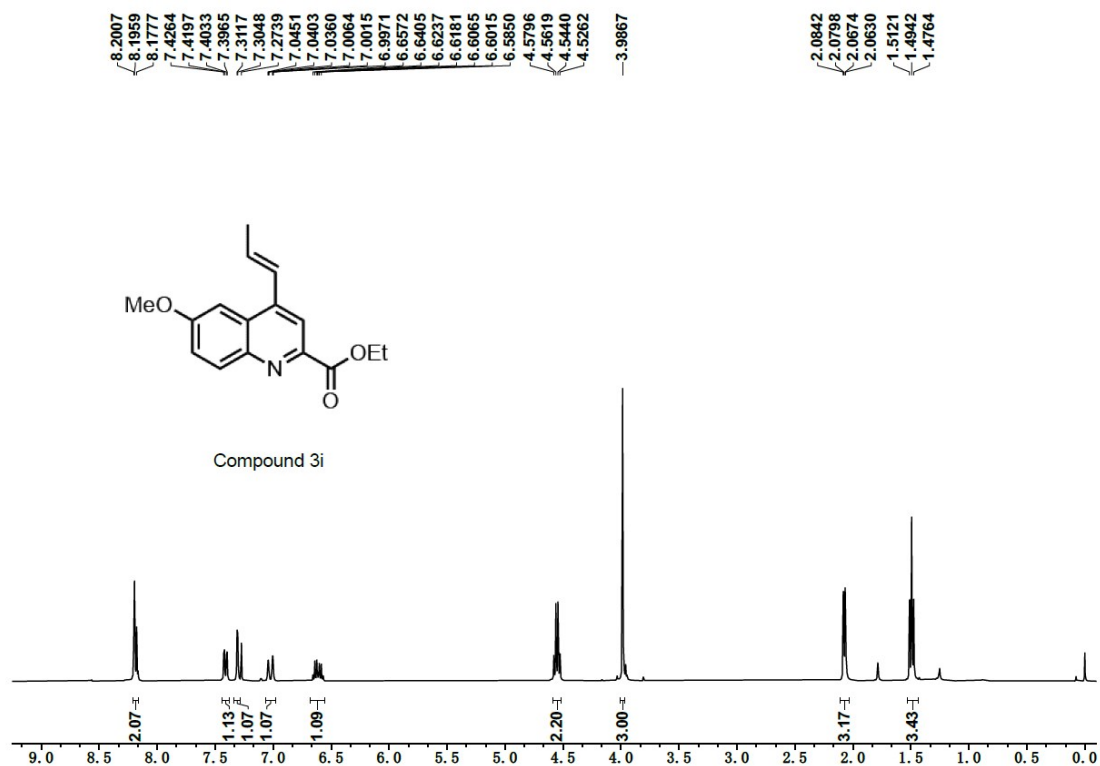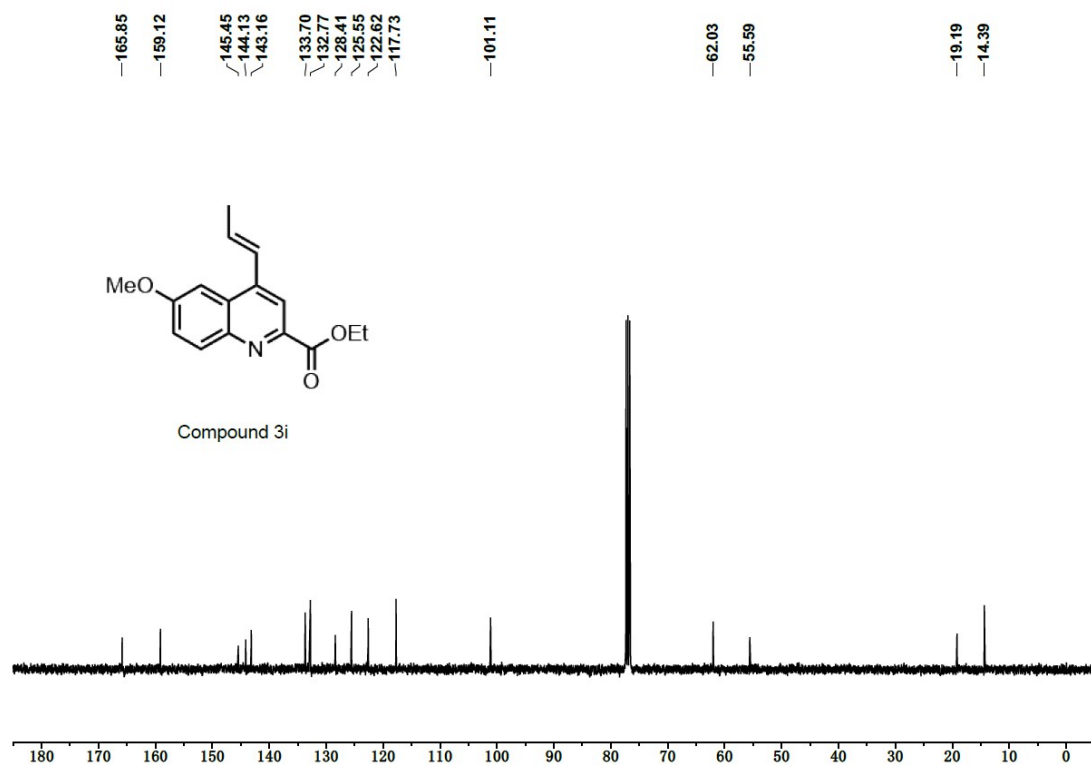

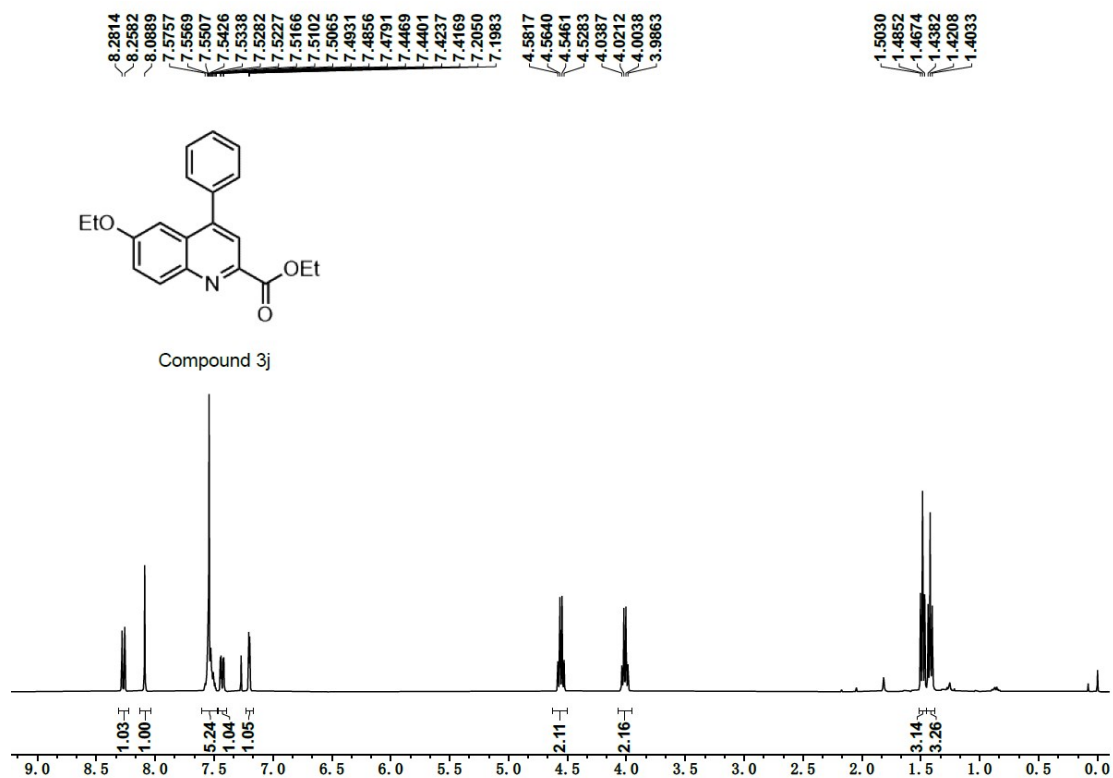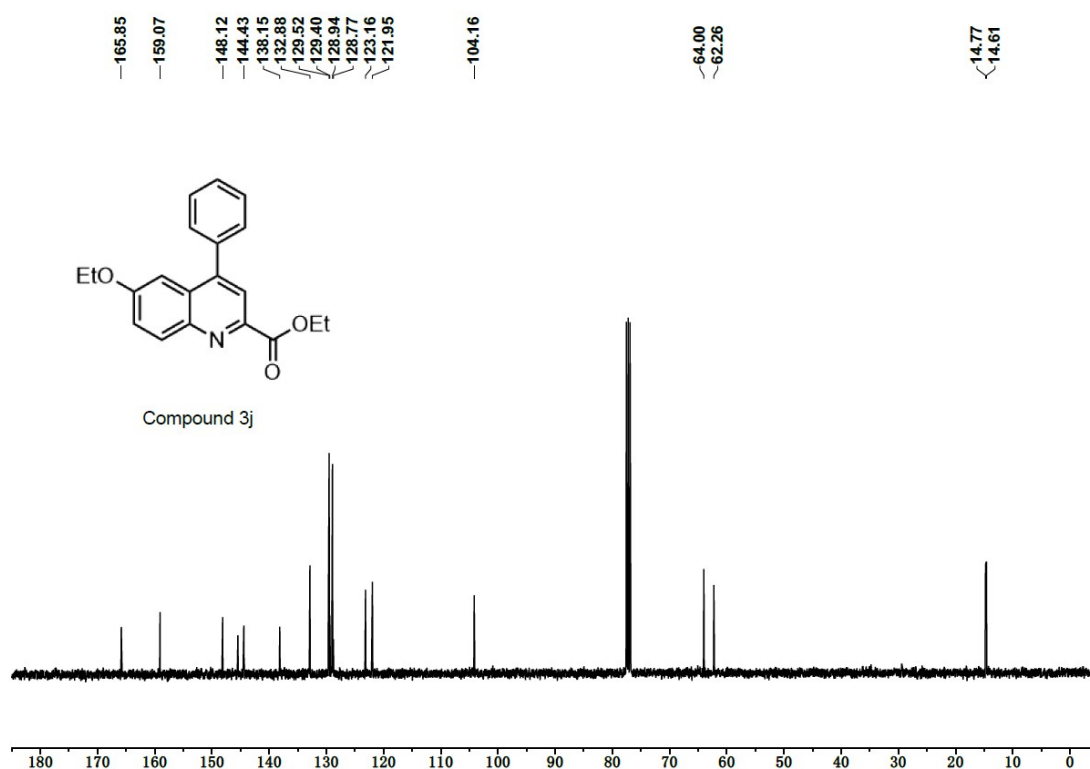

8.2861  
8.2645  
8.1061  
7.7126  
7.6393  
7.6345  
7.6176  
7.6128  
7.5890  
7.5840  
7.5797  
7.5642  
7.5502  
7.5417  
7.5308  
7.5234  
7.5079

4.5934  
4.5756  
4.5579  
4.5400

2.4988

1.5089  
1.4921  
1.4743

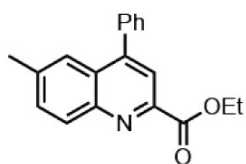

Compound 3k

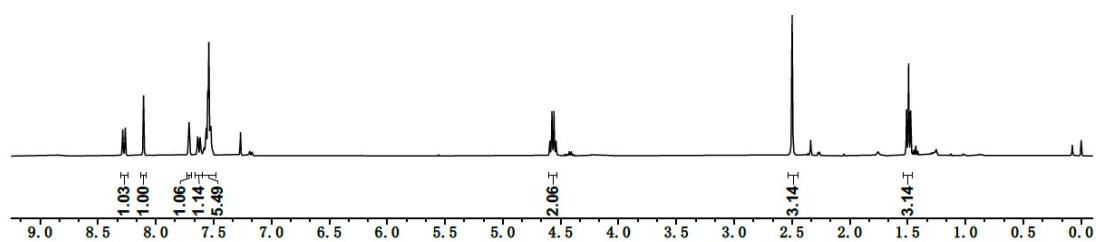

165.58  
148.89  
146.82  
146.75  
138.95  
137.71  
132.31  
130.85  
129.51  
128.62  
128.56  
127.75  
124.34  
121.40

62.18

22.02

14.38

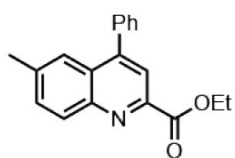

Compound 3k

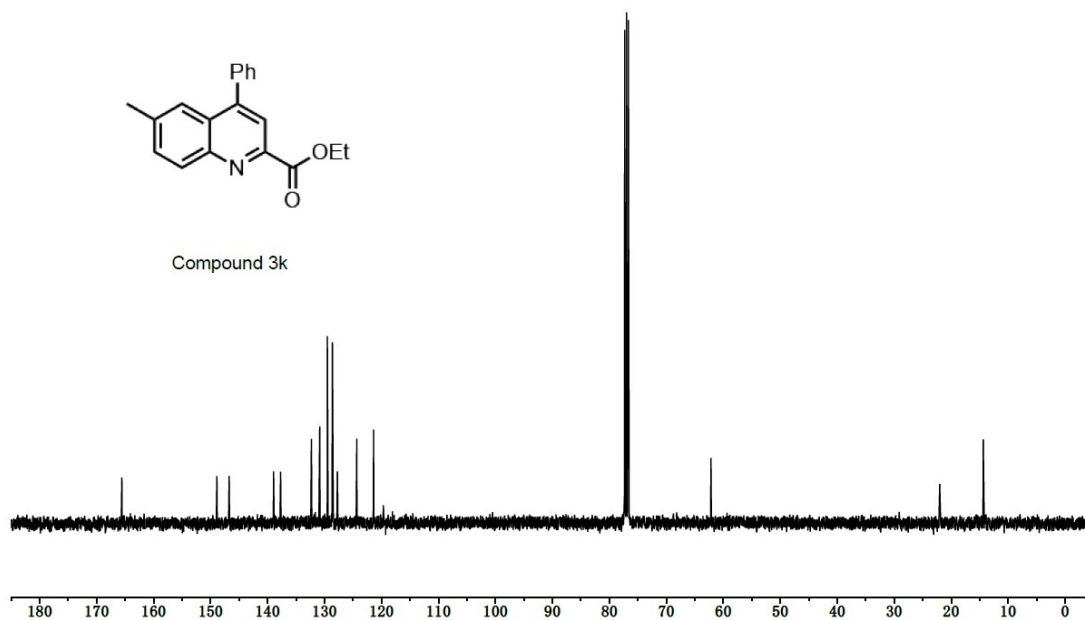

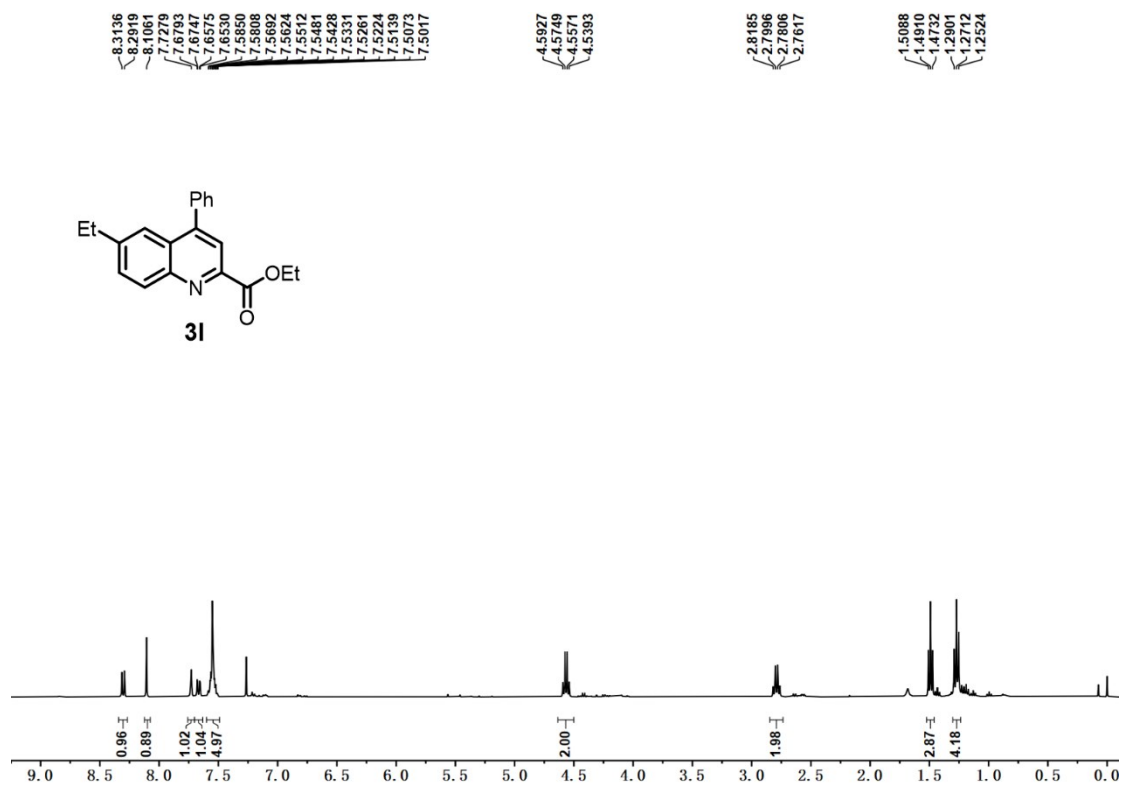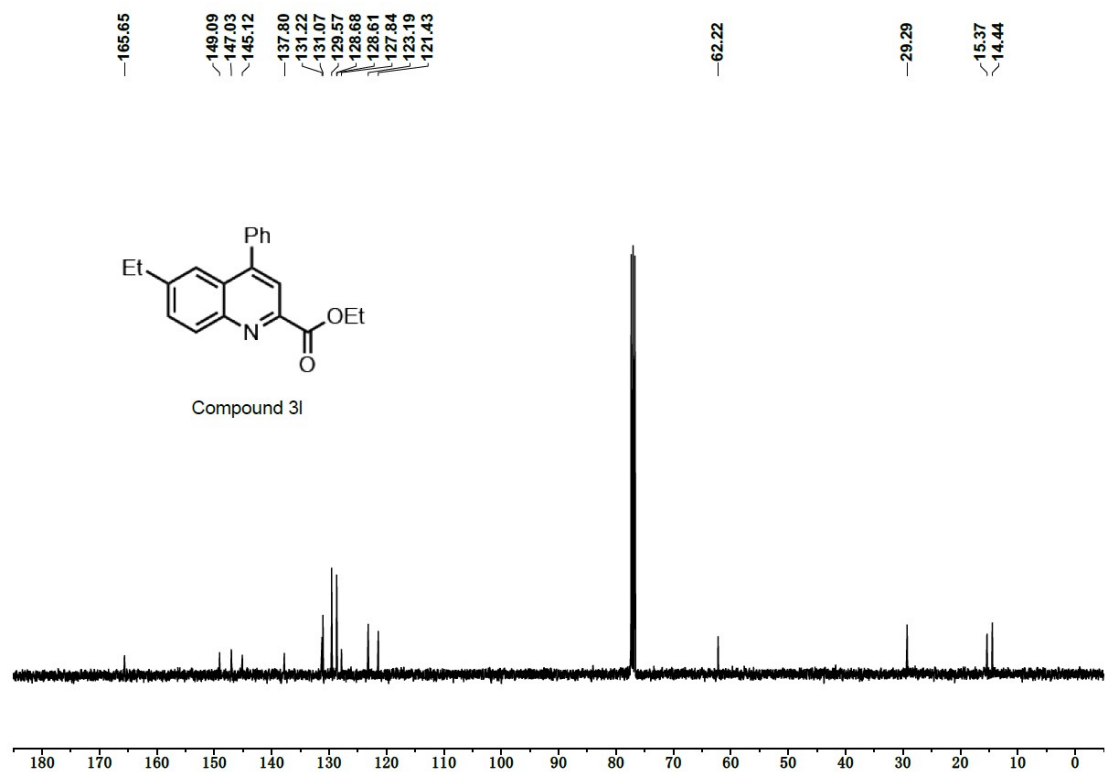

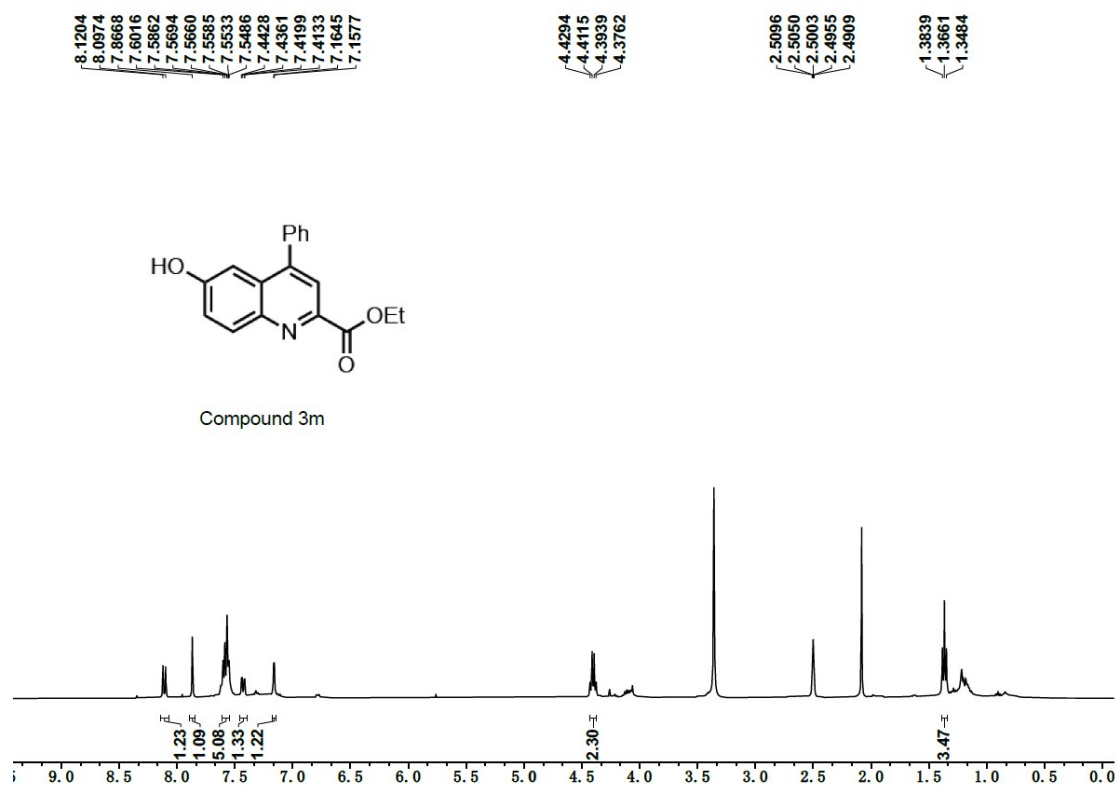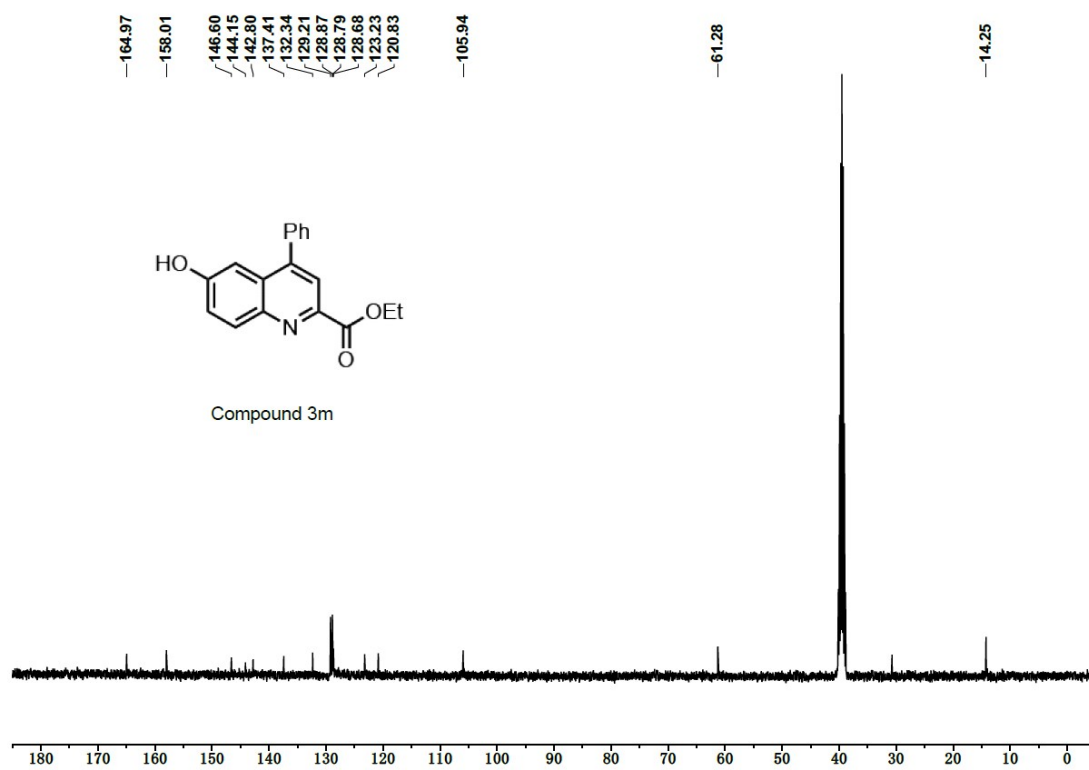

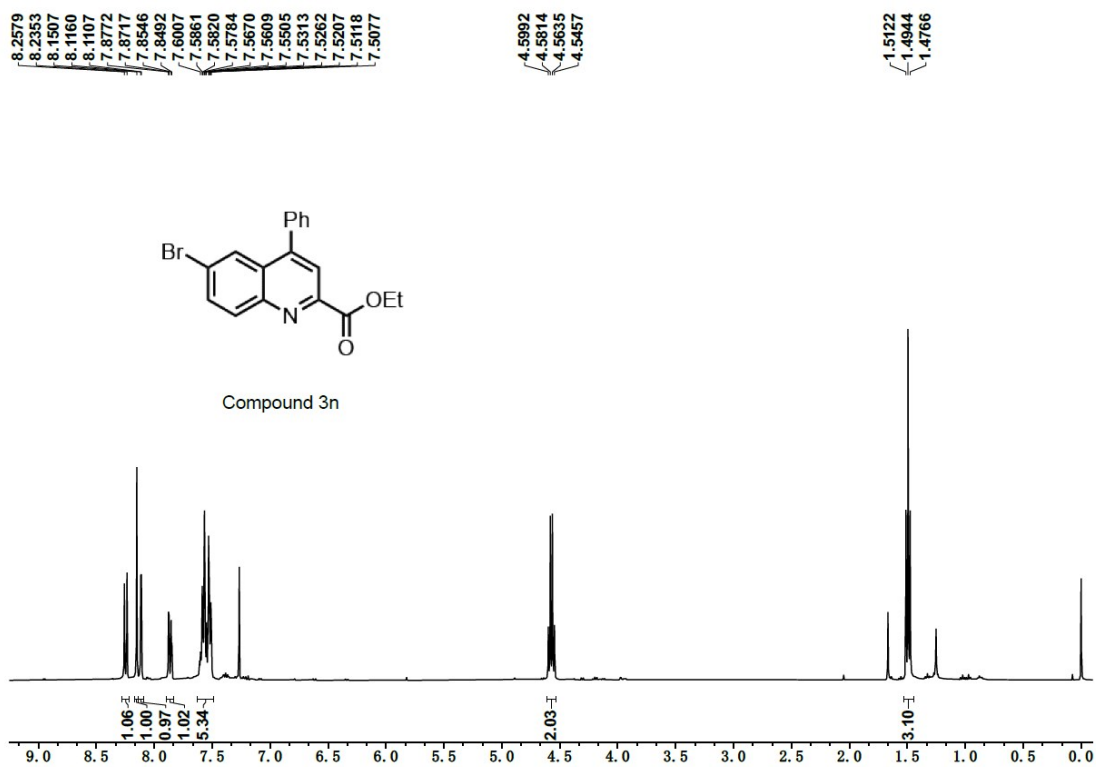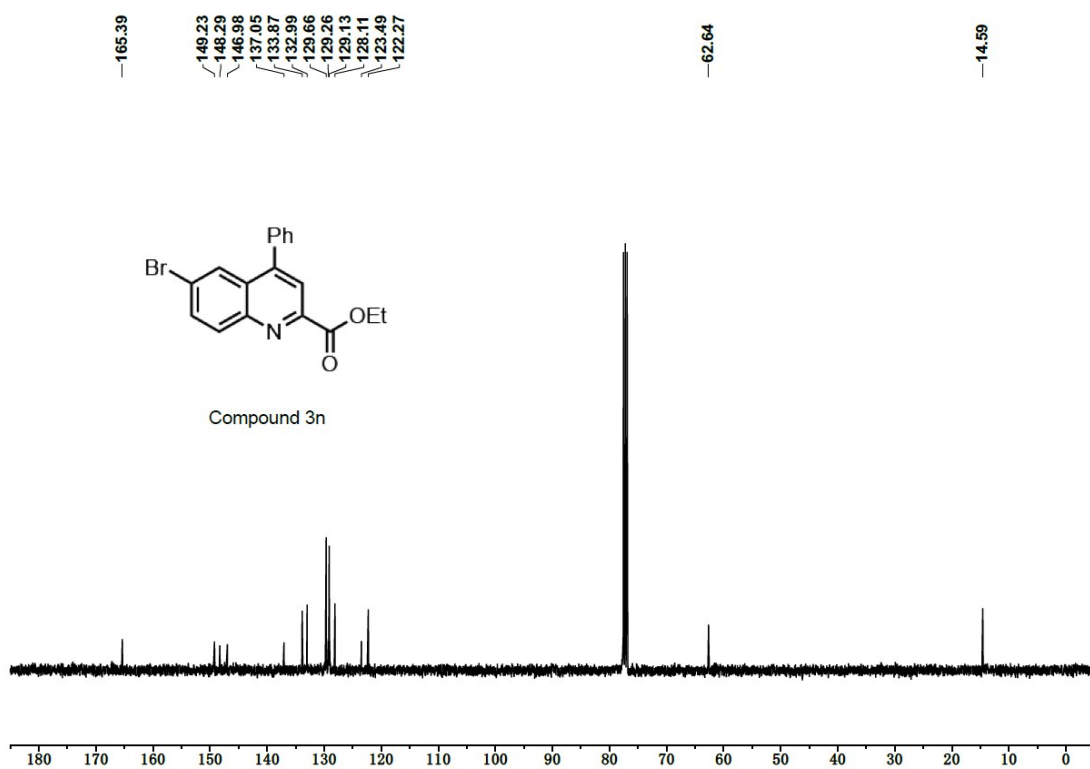

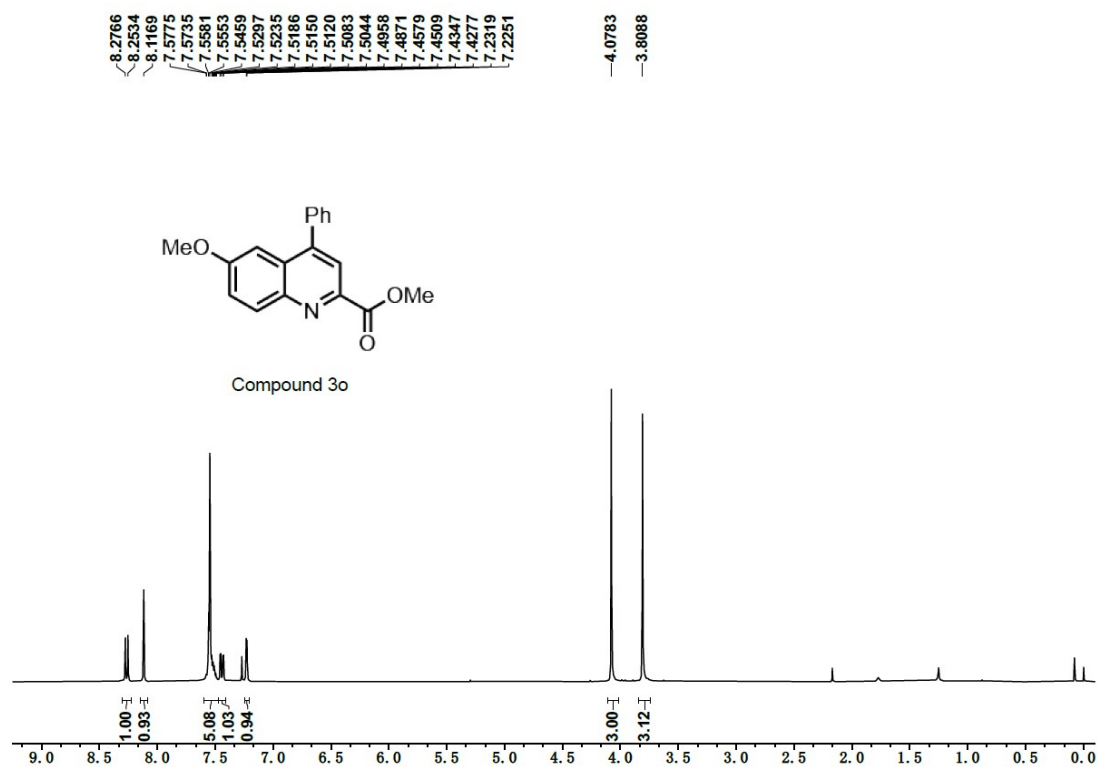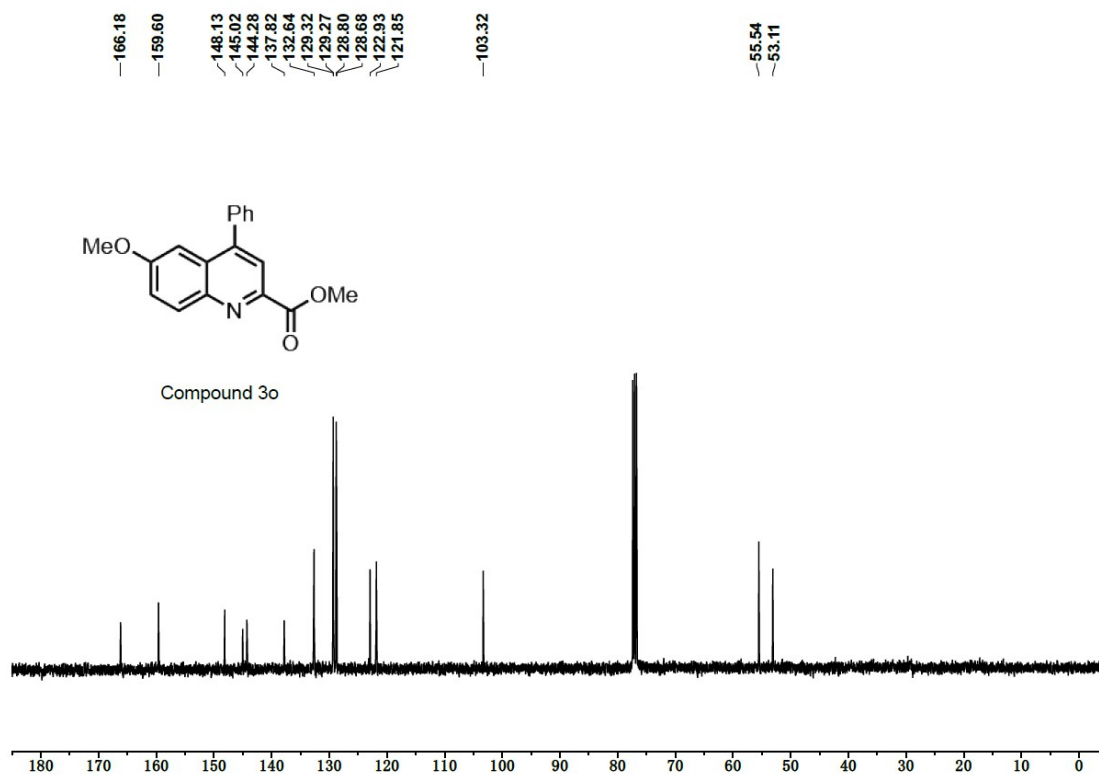

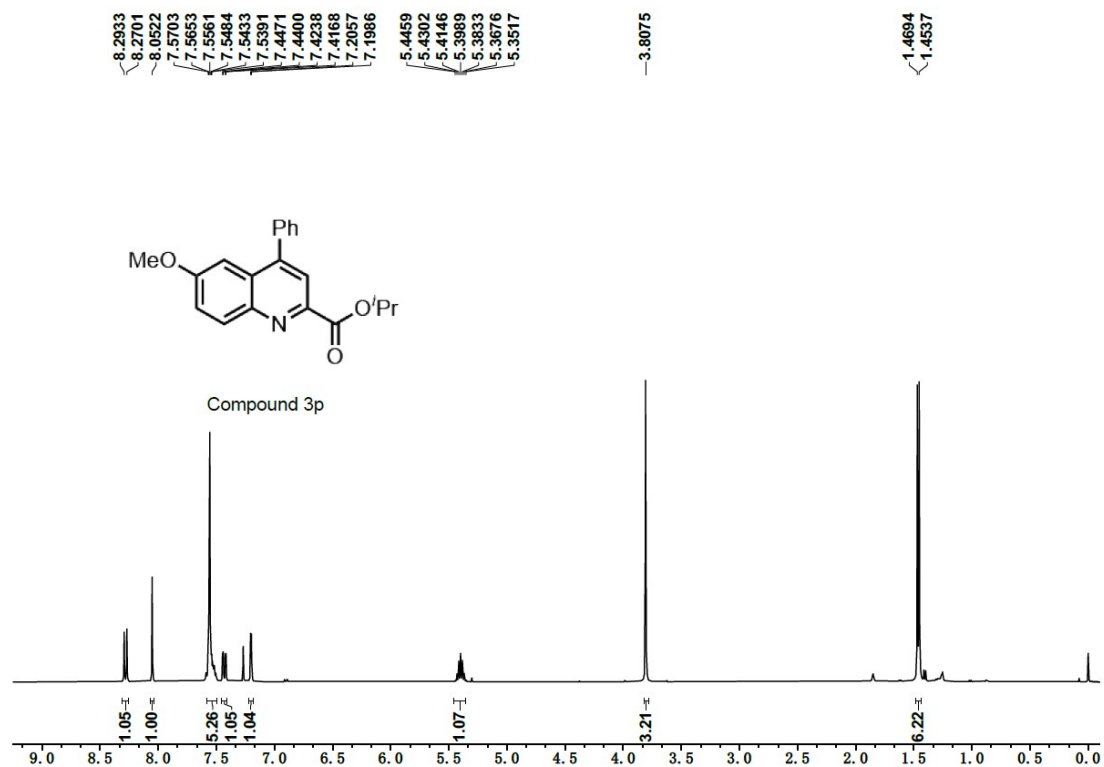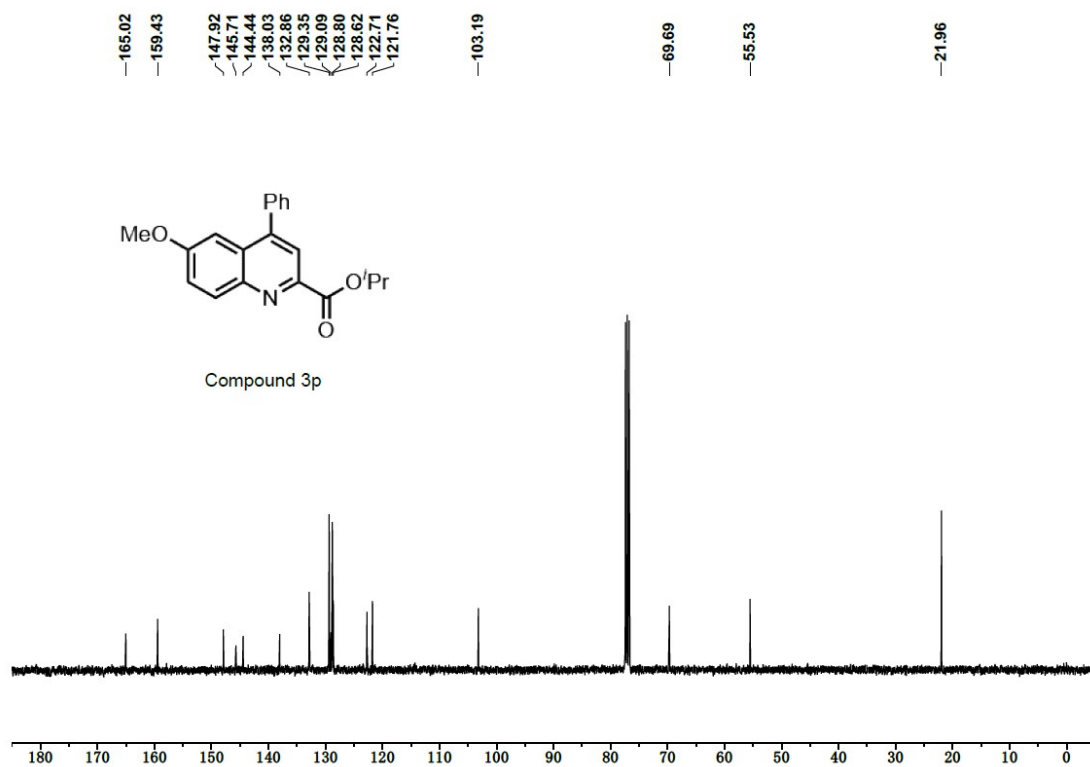



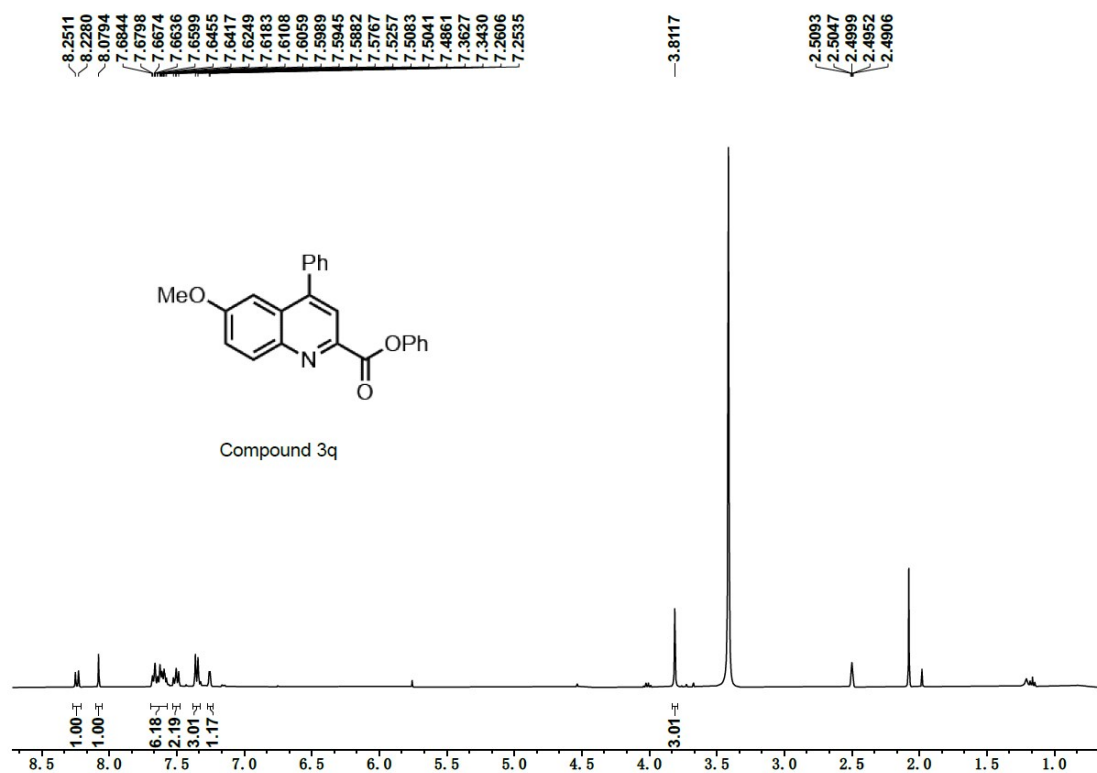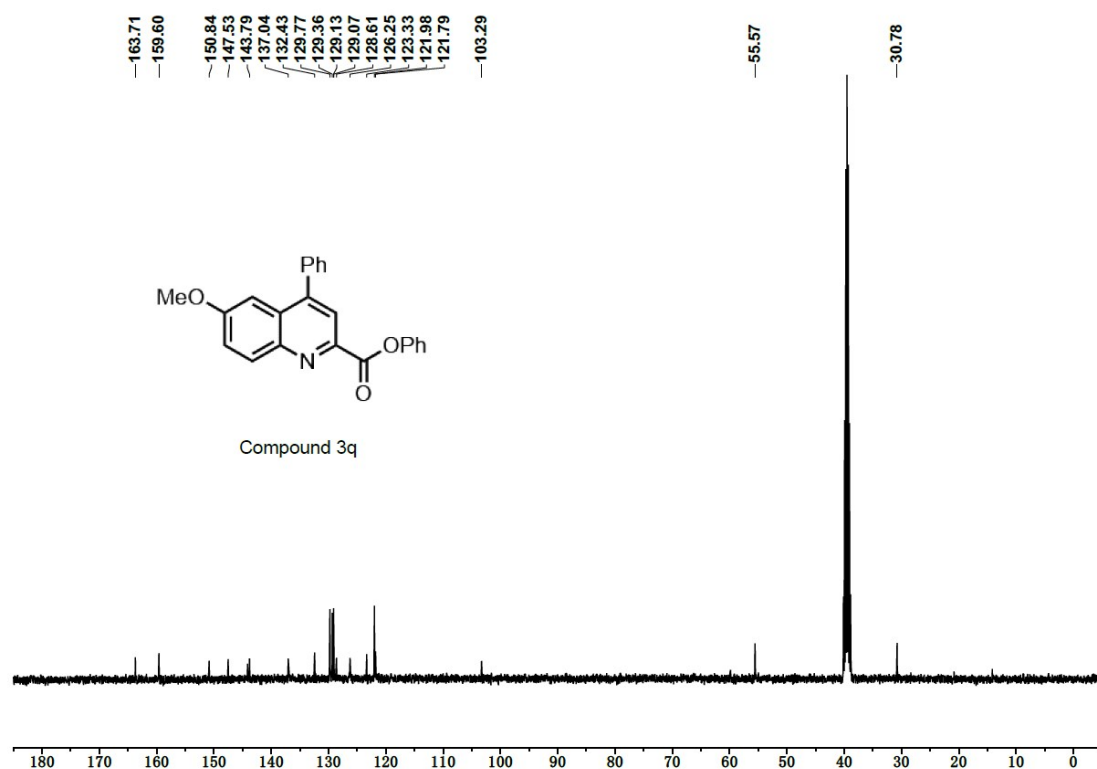

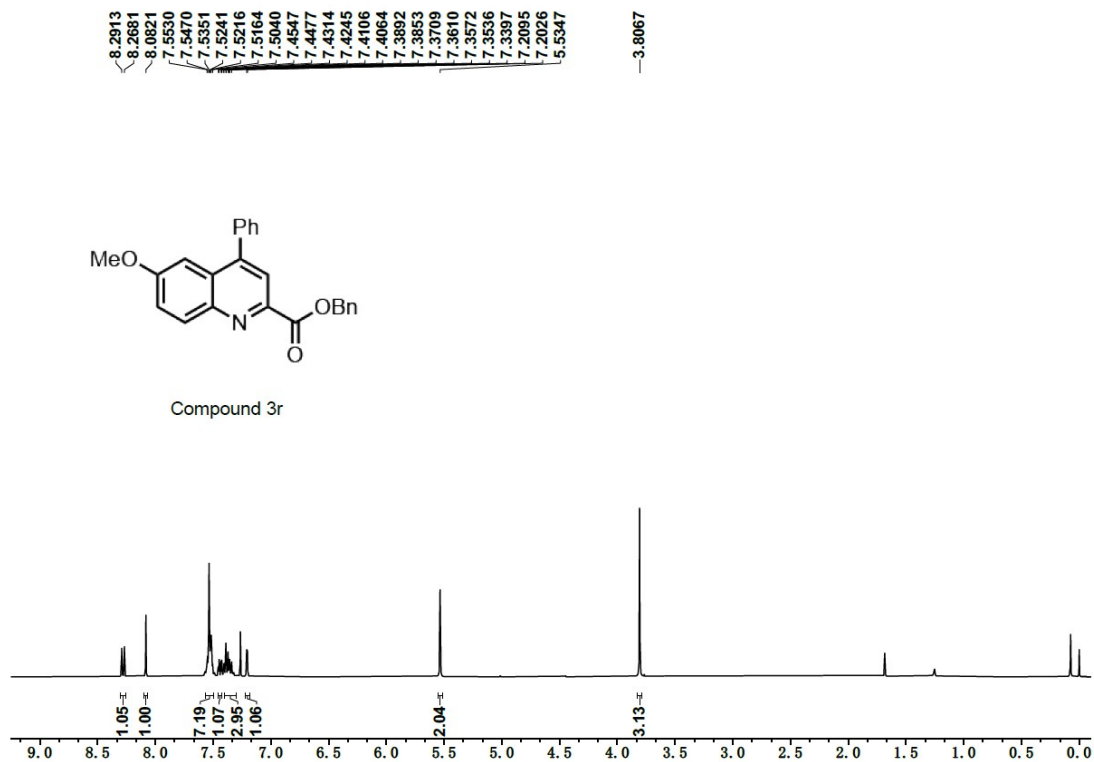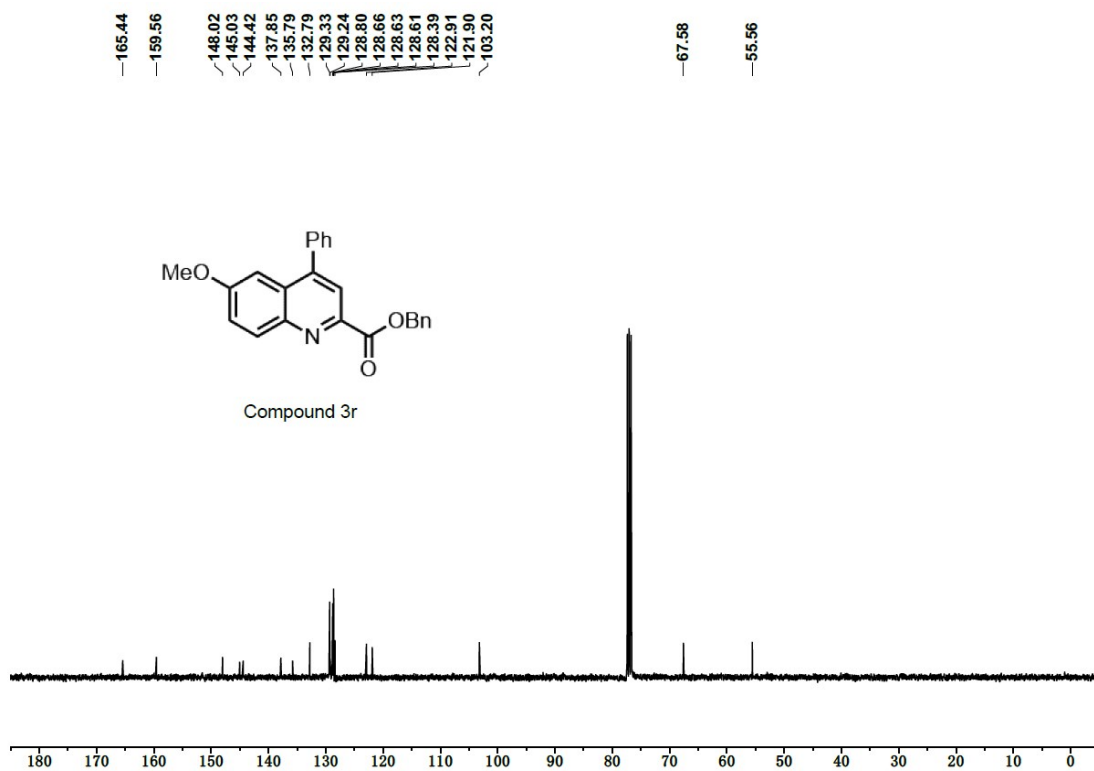

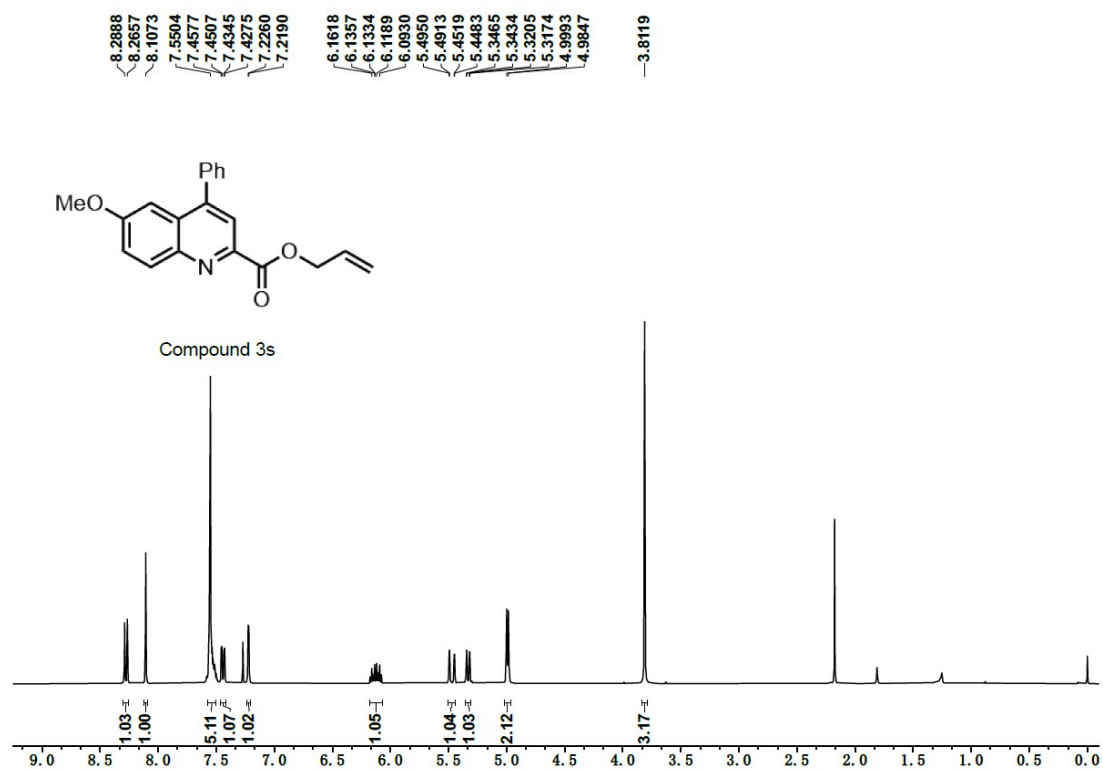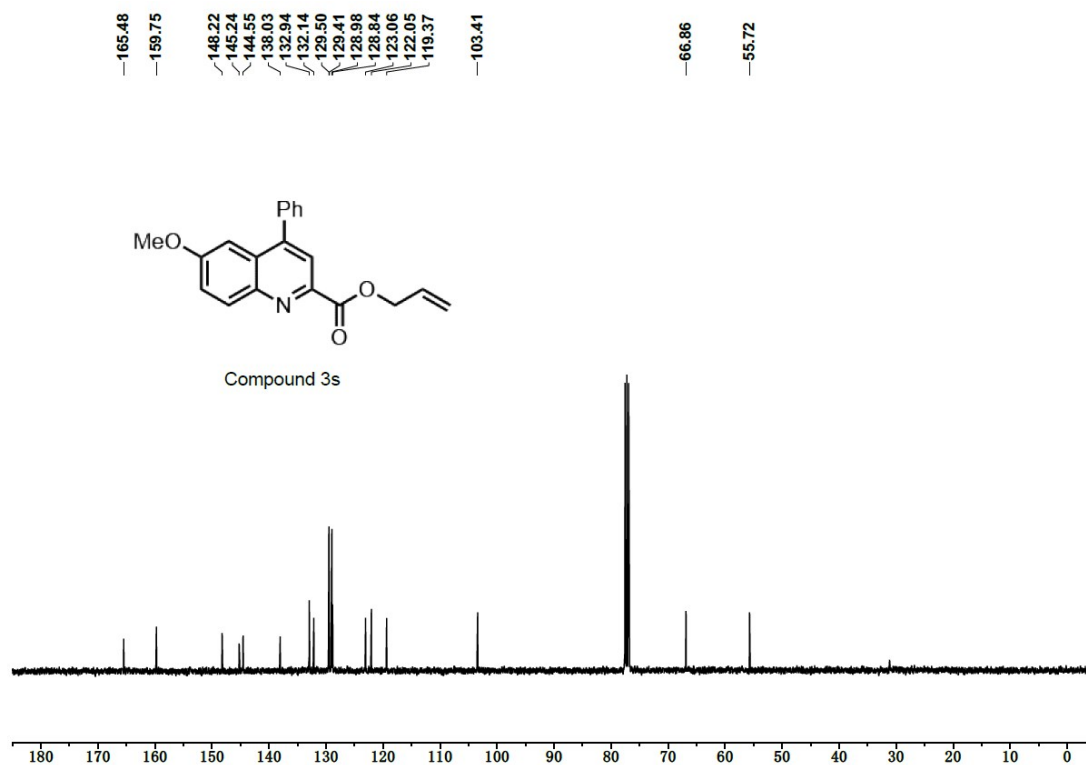

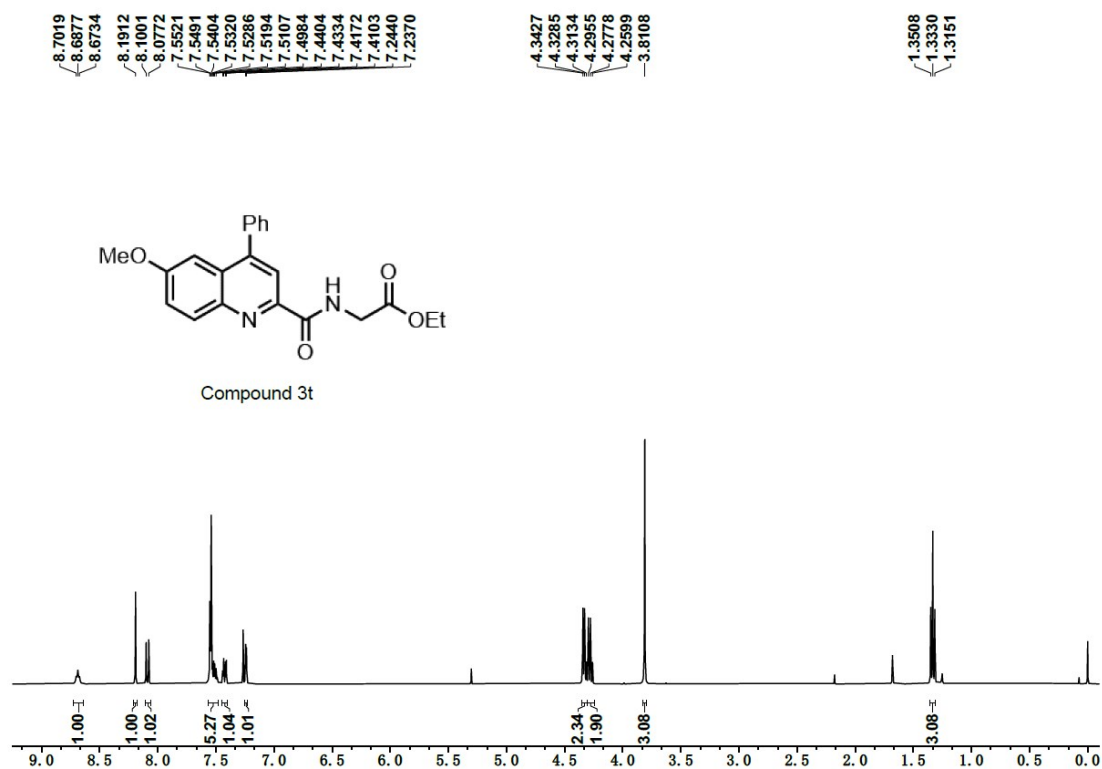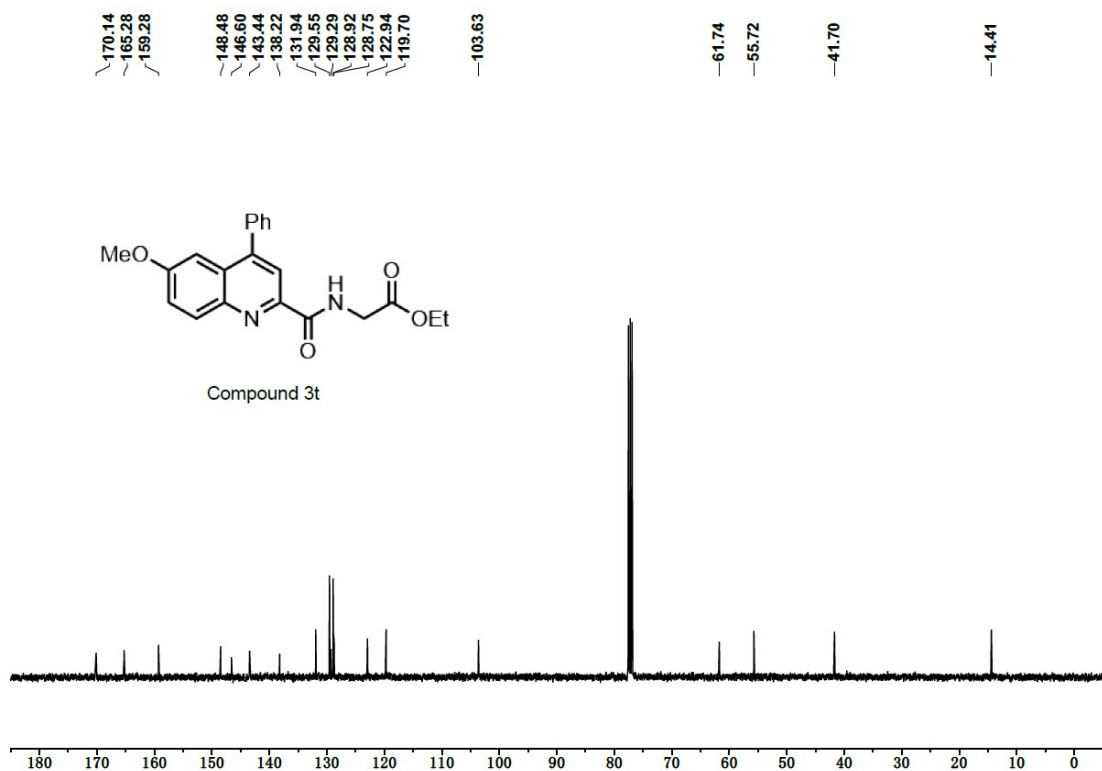

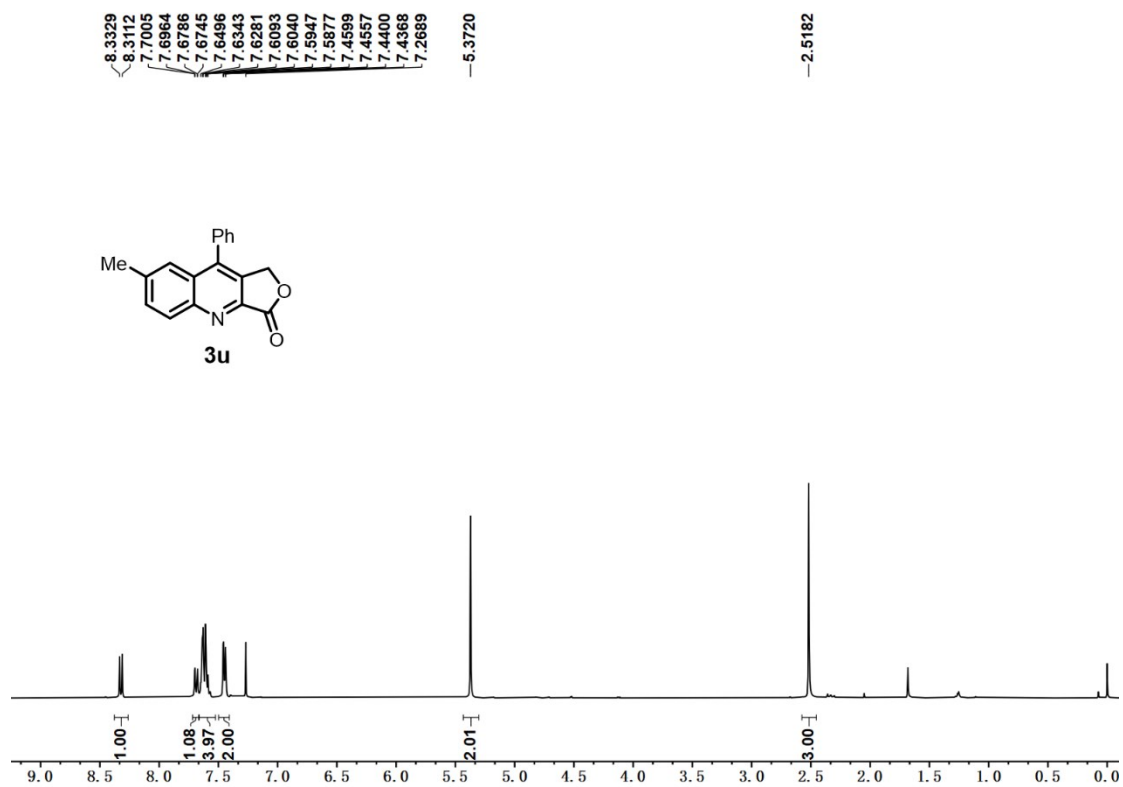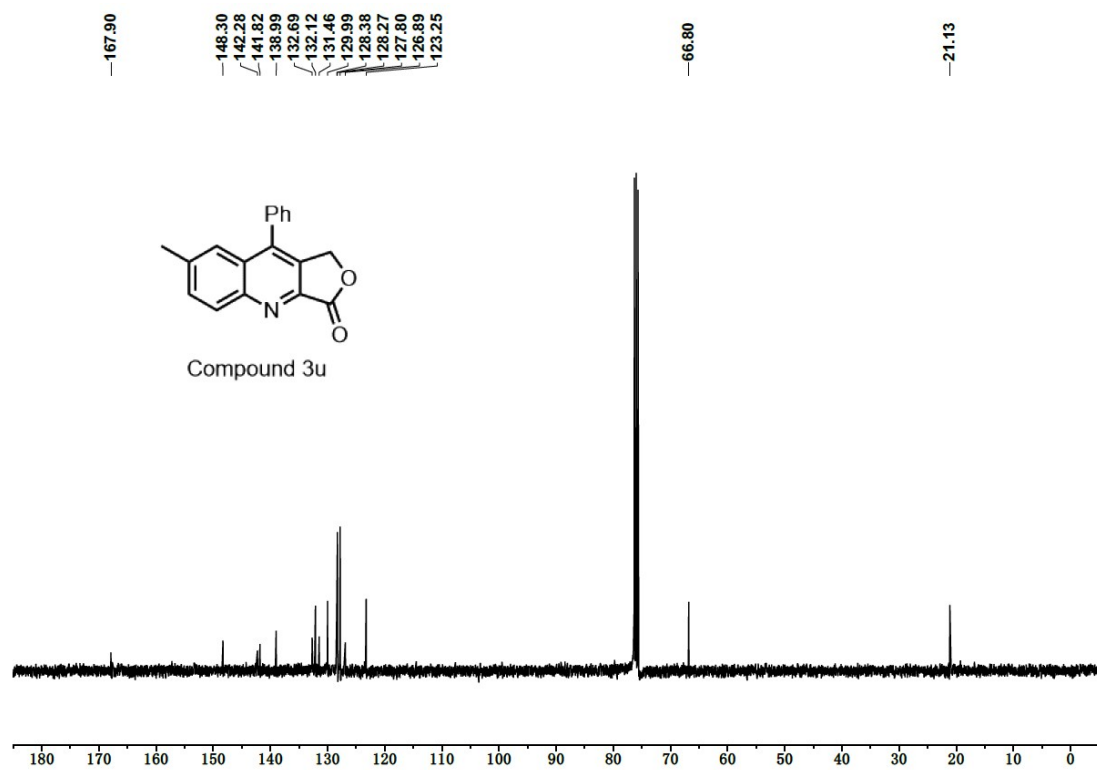

Supplement: d0ob01837f1.pdf [file d0ob01837f1.pdf]
